1  
2  
3  
4  
5  
6  
7  
8  
9  
10  
11  
12  
13  
14  
15  
16  
17  
18  
19  
20  
21  
22  
23

# Rats Sniff Off Toxic Air

Haoxuan Chen<sup>#</sup>, Xinyue Li<sup>#</sup> and Maosheng Yao\*

State Key Joint Laboratory of Environmental Simulation and Pollution Control,  
College of Environmental Sciences and Engineering, Peking University, Beijing  
100871, China

**Corresponding author:**

Maosheng Yao, PhD

Boya Distinguished Professor

State Key Joint Laboratory of Environmental Simulation and Pollution Control,  
College of Environmental Sciences and Engineering, Peking University, Beijing  
100871, China

Email: [yao@pku.edu.cn](mailto:yao@pku.edu.cn), Ph: +86 01062767282

<sup>#</sup> Both authors contributed equally

Beijing, China

August 2019

24 **Abstract Graphic**

25  
26  
27  
28  
29  
30  
31  
32  
33  
34

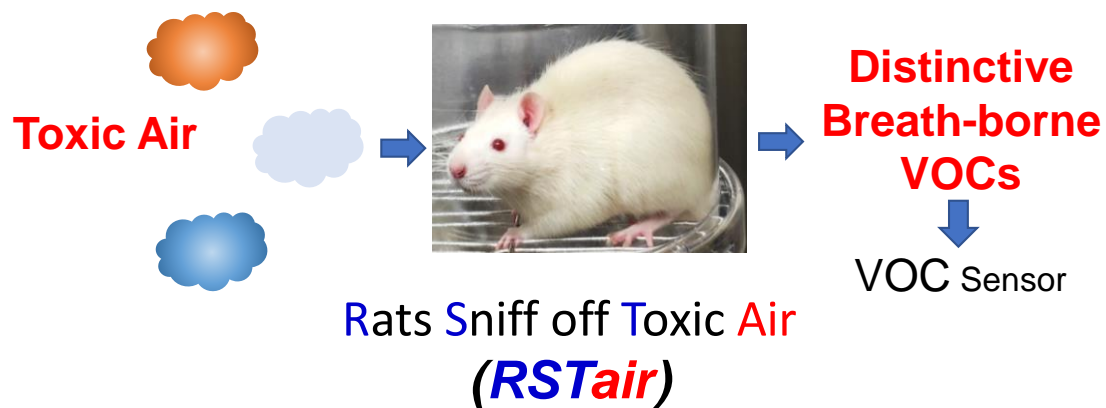

35

36 **Abstract**

37 Breathing air is a fundamental human need, yet its safety, e.g., when challenged by  
38 various harmful or lethal substances, is often not properly guarded. Currently, air  
39 toxicity is monitored only for single or limited number of known toxicants, thus failing  
40 to fully warn against possible hazardous air. Here, using a photoionization detector (PID)  
41 or GC-MS/FID we found that within minutes living rats emitted distinctive profiles of  
42 volatile organic compounds (VOCs) via breath when exposed to various airborne  
43 toxicants such as endotoxin, O<sub>3</sub>, ricin, and CO<sub>2</sub>. Compared to background indoor air,  
44 when exposed to ricin or endotoxin aerosols breath-borne VOC levels, especially that  
45 of carbon disulfide, were shown to decrease, while elevated levels were observed for  
46 O<sub>3</sub> and CO<sub>2</sub> exposures. Principal component analysis (PCA) revealed a clear contrast  
47 in breath-borne VOCs profiles of rats among different toxicant exposures. MicroRNA  
48 regulations such as miR-33, miR-146a and miR-155 from rats' blood samples also  
49 suggested varying mechanisms used by the rats in combating different air toxicant  
50 challenges. By integrating living rats, breath sampling, and VOC online detection, we  
51 pioneered a system that can real-time monitor air toxicity without the need of detecting  
52 specific species. Importantly, rats were shown to be able to sniff off toxic air.

53

54 **Keywords:** Rat, Volatile Organic Compound, microRNA, Online Monitoring Toxic Air

55

## 56 **1. Introduction**

57 Breathing air is a fundamental human need, however its safety is often not properly  
58 guarded. Common pollutants in the air include particulate matter (PM), biologicals, and  
59 also gaseous substances such as O<sub>3</sub> and NO<sub>x</sub>. Inhaling these pollutants can cause a  
60 variety of health problems such as respiratory, cardiovascular diseases, and even death  
61 <sup>1-2</sup>. For example, PM alone was shown to have resulted in 4.2 billion deaths in 2015 <sup>2-</sup>  
62 <sup>3</sup>. Exhibiting a positive correlation with daily mean mortality, ground ozone exposure  
63 resulted in decreased lung function and airway inflammation <sup>4-5</sup>. On the other hand,  
64 exposure to pathogenic bioaerosols including bacteria, fungi, virus, et al in the air can  
65 cause respiratory infections. Airborne exposure to some infectious agents can also lead  
66 to respiratory infection outbreaks: the severe acute respiratory syndrome (SARS) in  
67 2003, H1N1 flu in 2009, H7N9 avian influenza in 2013, and Middle East Respiratory  
68 Syndrome (MERS) in 2015. These outbreaks have resulted in grave human and  
69 economic costs. Besides, there is a growing concern about the risk of terrorist attack by  
70 intentionally releasing biological and chemical agents into the air to cause huge civilian  
71 casualties <sup>10</sup>. In the past, the Tokyo Subway Sarin Attack in 1995, for example, have  
72 caused 11 deaths and more than 5,000 injuries <sup>11</sup>. In 2001, anthrax spores attacks via  
73 postal mails in the United States have resulted in five deaths and 17 infections as a  
74 result of inhaling anthrax spores <sup>12</sup>. It is evidenced that inhaling unsafe air has become  
75 an increasing health concern. Yet, in many high profile events, in addition to the public  
76 sectors, the air being inhaled is not readily protected or properly guarded. Real-time  
77 monitoring of air toxicity is of great importance, which however is a long-standing  
78 significant challenge in the field.

79

80 For monitoring hazardous substances in the air, a variety of real-time online

81 monitoring methods have been previously developed or tested for individual pollutants  
82 such as the PM, and other chemicals<sup>13-16</sup>. While for bioaerosols, the adenosine  
83 triphosphate (ATP) bioluminescence technology, surface-enhanced Raman  
84 spectroscopy (SERS), bioaerosol mass spectrometry (BAMS), ultraviolet aerodynamic  
85 particle sizer (UVAPS) as well as silicon nanowire (SiNW) biosensor were investigated  
86 and attempted over the years<sup>17-19</sup>. It is well known that these existing or developed  
87 technologies are mostly restricted to either single agent or overall microbial  
88 concentration levels without identifying species. In addition, airborne pollutants and  
89 toxicity could vary greatly from one location to another<sup>20-21</sup>, thus presenting location-  
90 specific air toxicity and health effects. Current epidemiological or toxicological  
91 methods involving data analysis or animal and cells experiments cannot provide in situ  
92 air toxicity information, accordingly failing to represent the response at the time of  
93 exposure because biomarker levels evolve over time<sup>22</sup>. In addition, under certain  
94 scenarios (high profile meetings or locations) a rapid response to air toxicity needs to  
95 be in place in order to protect the interest. However, the response time is very  
96 demanding for an immediate effective countermeasure, for example, usually several  
97 minutes can be tolerated<sup>10,23</sup>. In many air environments, multiple hazardous pollutants  
98 could also co-exist even with unknown ones at a particular time, which makes  
99 protecting the air rather difficult, if not impossible, using current technologies of  
100 species level detection and warning.

101

102 Previously, olfactory receptors of mouse cells for odors<sup>24</sup>, immune B cells<sup>25</sup> for  
103 pathogen detections, and silicon nanowire sensor arrays for explosives were studied.  
104 Recently, a breath-borne biomarker detection system (dLABer) integrating rat's breath  
105 sampling, microfluidics and a silicon nanowire field effect transistor (SiNW FET)

106 device has been developed for real-time tracking biological molecules in the breath of  
107 rats exposed to particulate matter (PM). The dLABer system was shown to be able to  
108 online detect interleukins-6 (IL-6) level in rat's breath, and capable of differentiating  
109 between different PM toxicities from different cities using the biomarker level.  
110 However, as observed in the study the production of protein biomarkers could  
111 significantly lag behind the pollutant exposure, thus falling short of providing a timely  
112 warning against toxic air. Nonetheless, exhaled breath is increasingly being used in  
113 biomarker analysis in both medical and environmental health studies<sup>28-30</sup>. In addition  
114 to protein biomarkers, a large number of volatile compounds (e.g., nitric oxide, carbon  
115 monoxide, hydrocarbons) have been also studied to assess health status and even  
116 developed for clinical diagnosis. For example, ethane and n-pentane detected in the  
117 breath were linked to the *in vivo* level of lipid peroxidation and oxidative stress ; breath-  
118 borne acetone was shown to correlate with the metabolic state of diabetic patients. In  
119 addition, exhaled VOCs have been used for the diagnosis of asthma, lung cancer and  
120 other diseases. Undoubtedly, breath-borne VOC has emerged as a promising biomarker  
121 for health or environmental exposure monitoring.

122

123 Inspired by the dog sniff for explosive, the work here was conducted to investigate  
124 if we can use breath-borne VOCs from living rats to real-time monitor toxic air.  
125 Particularly, we wanted to study: 1) When rats are exposed to air toxicants, whether the  
126 VOC species and concentration in the exhaled breath change? If yes, how long does the  
127 change need to occur? 2) Are there any specific exhaled VOCs in response to different  
128 toxicants exposure including both chemical and biological agents? 3) To develop an  
129 online air toxicity analyzing system based on the real-time monitoring of exhaled VOCs  
130 of rats. The work here has demonstrated a great promise of online air toxicity

131 monitoring, and expected to revolutionize the field.

132

## 133 **2. Materials and methods**

### 134 **2.1 Rat breeding**

135 The Jugular Vascular Catheterizations (JVC) rat model described in our previous  
136 study was used in this work. Weighing 200–240 g at an age of 10 weeks, a total of 20  
137 male Wistar rats with jugular vein catheterization operation were purchased from a local  
138 provider (Beijing Vital River Laboratory Animal Technology Co., Ltd.). With about 1  
139 centimeter out of the skin, a flexible sterile catheter was embedded into the jugular vein  
140 and fixed on the back with staples. Under a 12 h light/12 h dark cycle, all the rats were  
141 raised in an animal care facility naturally with a normal chow diet. After 1 week of  
142 acclimation, the rats were randomly divided into 5 groups (4 rats in each group) for the  
143 exposure of different air toxicants. All animal experiments were approved by the  
144 Institutional Review Board of Peking University and relevant experiments were  
145 performed in accordance with the ethical standards (approval # LA2019294).

146

### 147 **2.2 Preparation of toxic air**

148 In this work, four different exposure toxicants (ricin, endotoxin, ozone and carbon  
149 dioxide) and indoor air (as a background control) for rats were prepared for the  
150 exposure experiments. Ricin was extracted from the seeds of castor produced in  
151 Xinjiang, China, and prepared by Institute of Microbiology and Epidemiology,  
152 Academy of Military Medical Sciences in Beijing. The endotoxin was purchased from  
153 Associates of Cape Cod, Inc., USA. The ricin and endotoxin suspensions were prepared  
154 by vigorously vortexing 40 µg of ricin or 50 ng endotoxin per ml deionized (DI) water  
155 for 20 min at a vortex rate of 3200 rpm (Vortex Genie-2, Scientific Industries Co., Ltd.,

156 USA). Detailed information about ricin preparation and exposure can be also found in  
157 our previous work. Here, ozone was generated by an ozone generator (Guangzhou  
158 Environmental Protection Electric Co., Ltd., China) using corona discharge method.  
159 The ozone was further diluted with indoor air for rat exposure experiments, and the  
160 ozone concentration in the exposed chamber was approximately 5 ppm. Carbon dioxide  
161 was purchased from Beijing Haike Yuanchang Utility Gas Co., Ltd., and diluted 20  
162 times with indoor air to a concentration of about 5%.

163

### 164 **2.3 Rat sniffs off toxic air ( $RST_{air}$ ) system and experimental procedure**

165 To investigate whether we can use breath-borne VOCs from living systems to real-  
166 time monitor toxic air, we have developed the system named as  $RST_{air}$  (Rat Sniffs off  
167 Toxic Air). As shown in Figure 1 and Figure S1 (Supporting Information), the system  
168 is composed of four major parts: toxicant generator, exposure chamber, exhaled breath  
169 sampling and online VOC analysis. Indoor air was used as carrier gas for generating  
170 toxicant aerosols (ricin and endotoxin) using a Collison Nebulizer (BGI, Inc., USA) or  
171 diluting toxicants gas (ozone and carbon dioxide). The toxicant aerosol or toxicant gas  
172 was introduced into the exposure chamber at a flow rate of 1 L/min. As shown in Figure  
173 S1, a metabolic cage was used as the exposure chamber which can allow rat's feces and  
174 urine to fall from below quickly so as to reduce their influences on VOC analysis. In  
175 addition, teflon tubes and vales were also applied to reducing adsorption loss of VOCs.  
176 When performing the experiments, the rats were placed in the exposure chamber.  
177 Indoor air was first introduced into the chamber for 10 minutes, then followed by each  
178 of tested toxicants for about 10 minutes to conduct exposure tests. Before and after the  
179 exposure, bloods of the rats were taken. As for the exhaled breath sampling and VOC  
180 analysis, the photoionization detector (PID) (MOCON, Inc., USA) coupled with an air



181 pump was used to real-time monitor TVOC at a flow rate of 0.6 L/min. Besides, the  
182 breath samples in the chamber were also collected by using a Silonite canister (Entech  
183 Instruments, Inc., USA), and VOCs species were analyzed by a gas chromatograph-  
184 mass spectrometry/flame ionization detection (GC-MS/FID) system (Agilent  
185 Technologies, Inc., USA). Each of the experiments were conducted with three rats and  
186 repeated three times independently.

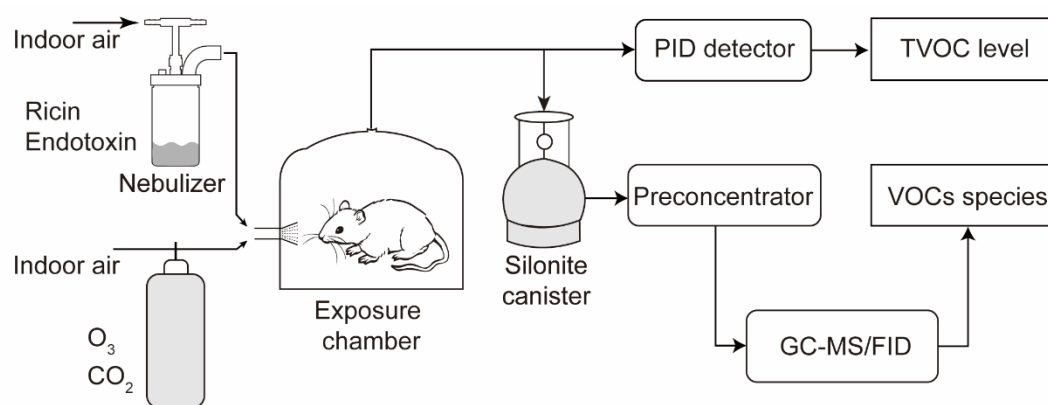

187

188 **Figure 1.** Rat sniffs off toxic air ( $RST_{air}$ ) system: ricin and endotoxin were aerosolized  
189 by a Collison nebulizer (BGI, Inc., USA) using indoor air; ozone and carbon dioxide  
190 were diluted with indoor air before introduced into the chamber. The metabolic cage  
191 was used as the chamber for exposure and air sampling. After placing rats into the  
192 chamber, the VOCs in the chamber before and after the toxicant exposure were  
193 analyzed by the PID directly and also by GC-MS/FID system after being collected by  
194 using the Silonite canister. During the VOC measurements, the toxicant exposure was  
195 terminated. Each time only one rat was placed into the chamber.

196

#### 197 **2.4 Measurements of exhaled VOCs by PID and GC-MS/FID**

198 In this work, total VOCs (TVOC) level in the exposure chamber was real-time  
199 monitored by a PID sensor during all the experiments: 1) when the rats were not in the  
200 chamber (background air); 2) rats in the chamber (before toxicant exposure) and rats in

201 the chamber (after toxicant exposure). The working procedure of the PID sensor is to  
202 first ionize the VOCs gas with a high-energy UV lamp, and then the ionized fragments  
203 are collected by the ion chamber to generate a current signal. The signal in general is  
204 proportional to the concentration of the target VOCs. In this study, the PID sensor is  
205 assembled with the oil-free pump and pre-filter and a signal encoder, and the signal is  
206 transmitted and displayed in real time. The sensor was calibrated using 1 ppm  
207 isobutylene prior to use.

208

209 Meanwhile, as mentioned above air samples were also collected by a 3.2 L Silonite  
210 canister (Entech Instruments, Inc., USA) at the flow rate of 0.8 L/min for the qualitative  
211 and quantitative VOC species detection. The air samples were then transferred into the  
212 pre-concentrator (7200, Entech Instruments, Inc., USA) and analyzed by gas  
213 chromatography (GC) together with Mass Spectrometry (MS) and Flame Ionization  
214 Detector (FID) (5975C/7890A, Agilent Technologies, Inc., USA) within 12 hours. The  
215 GC-MS/FID analysis work was provided by Tianjin Zhongfei Huazheng Testing  
216 Technology Co., Ltd, and is briefly described as follows: the Entech 7200 system was  
217 used to pre-concentrate the sample, including enrichment of the sample, and removal  
218 of water and carbon dioxide from the sample. Then, an Agilent 5975C/7890A gas  
219 chromatography mass spectrometer was used to qualitatively analyze sample according  
220 to the standard mass spectrometry library and the mixed gas standard compound. The  
221 multi-point calibration working curve was developed by the external and internal  
222 standard method for quantitative analysis. The external standard gases used are: mixed  
223 standard gas of 57 Photochemical Assessment Monitoring Stations (PAMS) gas, 12  
224 kinds of aldehyde and ketone gases and 47 TO-15&17 gases (including aromatic  
225 hydrocarbons, halogenated hydrocarbons and oxygenated organic compounds). The

226 internal standard gases are mixtures of bromochloromethane, 1,4-difluorobenzene,  
227 deuterated chlorobenzene, and 1-bromo-3-fluorobenzene. The above standard gases  
228 were purchased from Scott Specialty Gases, USA.

229

## 230 **2.5 Blood microRNA detection**

231 Before and after each toxicant exposure, 0.75 mL blood samples from rats were  
232 taken through the catheter using sterile syringes with 23G flat-end needles and kept in  
233 -20 °C for microRNA analysis. The blood microRNAs in the blood samples such as  
234 miR-125b, miR-155, miR-146a, miR-21, miR-20b, miR-210, miR-122, and miR-33  
235 were analyzed using a RT-qPCR array (Wcgene Biotech, Inc., China). Total RNAs in  
236 the blood samples, including microRNAs, were extracted using a Trizol reagent (Sigma  
237 Aldrich, Inc., USA) according to the manufacturer's instructions. Subsequently, the  
238 purified RNAs were polyadenylated through a poly(A) polymerase reaction and was  
239 then reversed-transcribed into complementary DNA (cDNA). TIANGEN® miRcute  
240 Plus miRNA First-Strand cDNA Kit (Code No. KR211) was used in the reverse  
241 transcriptional reaction system of total 10 µL, including 5 µL 2x miRNA RT Reaction  
242 Buffer, 1 µL miRNA RT Enzyme Mix and 4 µL RNA sample. The reaction conditions  
243 are 40 °C for 60 mins and 95 °C for 3 mins. The cDNA was quantified in real-time  
244 SYBR Green RT-qPCR reactions with the specific microRNA qPCR Assay Primers.  
245 TIANGEN® miRcute Plus miRNA qPCR Kit (SYBR Green) (Code No. FP411) was  
246 used in the qPCR reaction system of total 10 µL, including 5 µL 2x miRcute Plus  
247 miRNA PreMix (SYBR&ROX), 0.2 µL Forward Primer, 0.2 µL Reverse Primer, 1 µL  
248 50X ROX Reference Dye, 1 µL DNA Sample and 2.6 µL ddH<sub>2</sub>O. The cycling  
249 conditions are 95 °C for 15 min, followed by 40 cycles at 94 °C for 20s, 60 °C for 15s  
250 and 72°C for 30s. The primers used for qPCR are presented in Table S1 (Supporting

251 Information).

252

### 253 **3. Statistical analysis**

254 In this study, the TVOC levels for all samples detected by the PID sensor were not  
255 normally distributed, so the Mann-Whitney rank sum test was used to analyze the  
256 differences in TVOC levels before and after each toxicant exposure. The t-test was used  
257 to analyze the differences in TVOC change rates between each toxicant exposure group  
258 (PID instrument failure for one rat in each group) and the control group (indoor air).  
259 For individual VOC concentrations by GC-MS/FID, the paired t-test was used to  
260 analyze differences for each VOC species before and after the exposure. The software  
261 Canoco 4.5 was used to visualize the VOC profile distance and relatedness between the  
262 samples of different groups using the principal component analysis (PCA). Besides, the  
263 concentrations of micro-RNAs in blood samples from different rat groups were  
264 determined by RT-qPCR. For the group exposed to carbon dioxide, blood samples were  
265 only taken from two rats (before and after the 10-min exposure) because of catheter  
266 blockage for the other two. For the other three groups, blood samples were obtained for  
267 all four rats. The outliers were examined and eliminated by a Grubbs test. The  
268 differences between micro-RNA levels in blood samples before and after the exposure  
269 in one group were analyzed using a paired t-test (data exhibited a normal distribution)  
270 or Wilcoxon signed rank test (data did not follow a normal distribution). All the  
271 statistical tests were performed via the statistical component of SigmaPlot 12.5 (Systat  
272 Software, Inc., USA), and a p-value of less than 0.05 indicated a statistically significant  
273 difference at a confidence level of 95%.

274

### 275 **4. Results and discussion**

## 276 4.1 Results

### 277 *TVOC monitoring for the toxicants exposure*

278 As described in the experimental section, four toxicants (ricin, endotoxin, ozone  
279 and carbon dioxide) and indoor air (as a background control) were used for inhalation  
280 exposure in rats. Before and after the exposure, the TVOC level in the exposure  
281 chamber was monitored by the PID sensor. For each group, the TVOC levels of only 3  
282 rats (PID instrument failure for one rat) were shown in Figure 2. The indoor air  
283 background TVOC was found to be less than 0.02 ppm. After one rat was placed in the  
284 exposure chamber, the TVOC level in the cage was shown to first gradually increase as  
285 shown in Figure 2, then reach a relatively stable level after about 500 seconds. The  
286 TVOC level before the exposure (indoor air) when one rat was in the chamber was  
287 about 2 ppm as shown in Figure 2, except for the CO<sub>2</sub> group of which was about 0.5-  
288 0.8 ppm (These background differences, if any, applied to both control and exposure  
289 tests, thus presenting no influences on the same experiments). The air pump of the PID  
290 sensor was then turned off, and air in the exposure chamber was sampled using a  
291 Silonite canister. After the sampling (about four minutes) was completed, each of the  
292 tested toxicants was then introduced into the exposure chamber. After the exposure (ten  
293 minutes) was completed, the original indoor air supply was provided again to each rat,  
294 and the TVOC monitoring by the PID sensor was resumed. As shown in Figure 2, the  
295 differences in TVOC levels for indoor air exposures (different times: “before” and  
296 “after”, but the same indoor air) were small (the average change rate was about  $-4\% \pm 1.4\%$   
297 (95% confidence interval)), although the Mann-Whitney Rank Sum Test showed that  
298 for each of the rats, the difference (over some time for the indoor air) was significant  
299 ( $p\text{-value} < 0.001$ ). The difference may be caused by the error of PID itself or variations  
300 of indoor air compositions over the time, and this change rates ( $n=3$ ) of the control

301 group (indoor air) was then served as the reference for other toxicant exposures in the  
302 statistical analysis. During the indoor air experiment, the rats were seen to carry out  
303 normal life activities when in the exposure chamber, and correspondingly the TVOCs  
304 in the chamber were shown to remain relatively stable.

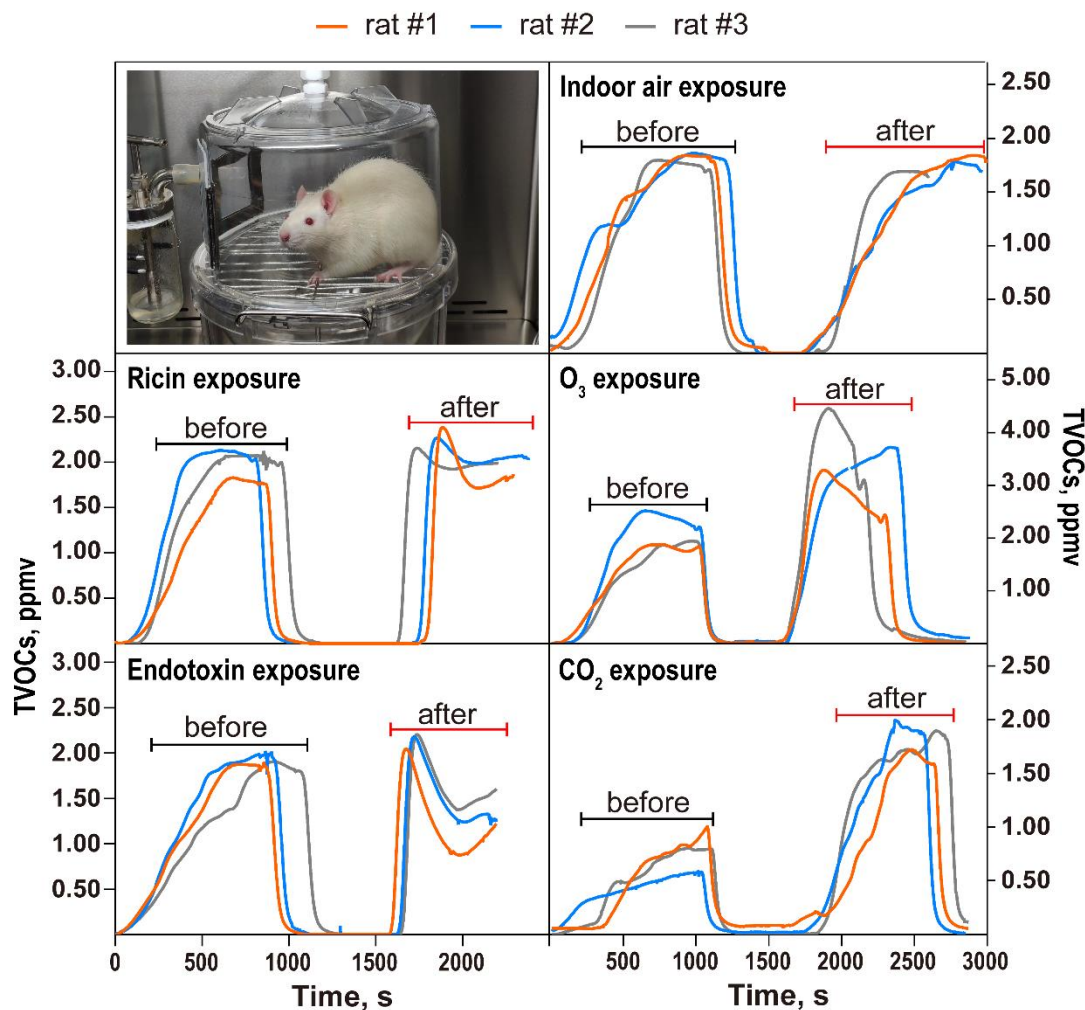

305

306 **Figure 2.** Real-time continuous measurements of exhaled TVOC levels in the chamber  
307 when rats were exposed to different toxicants via inhalation for 10 mins: Indoor air,  
308 ricin, endotoxin, O<sub>3</sub> and CO<sub>2</sub>. During the exposure processes, the PID sensor was turned  
309 off. Data lines (measurement time was 1000 s) represent results from three individual  
310 rats (#1, #2, #3) before or after exposure to each of the air toxicants (aerosolized  
311 amounts described in the experimental section) tested. Each exposure test was

312 independently repeated with four rats from the same group (PID instrument failure for  
313 one rat).

314

315 In contrast, TVOC levels were shown to vary greatly with different toxicant  
316 exposures as shown in Figure 2. For example, as shown in Figure 2, when rats were  
317 exposed to the ricin, the TVOC level was observed first to increase slightly, then  
318 decreased to a level comparable to that of before exposure with an average change rate  
319 of  $-3\% \pm 1.6$  (Mann-Whitney Rank Sum Test, all p-values $<0.001$ ). Compared to the  
320 control group (indoor air) shown in Figure 2, the difference of the TVOC change rate  
321 was not significant for the ricin exposure (t-test, p-value=0.426). For ricin exposure, its  
322 concentration (40  $\mu\text{g/mL}$  aerosolized) might be too low in aerosol state after the  
323 aerosolization from the liquid to produce a detectable response from the rats. This  
324 suggests that ricin, given the amount aerosolized here, presented no additional health  
325 challenge compared to the indoor air at the time of the experiment. Compared to the  
326 ricin exposure, however we observed a different phenomenon for the endotoxin (50  
327  $\text{ng/mL}$  aerosolized) tests as shown in Figure 2. Upon the endotoxin exposure, the TVOC  
328 level was observed to first increase slightly, and then surprisingly decreased to a level  
329 that was about 21-46% below the pre-exposure level after four minutes (Mann-Whitney  
330 Rank Sum Test, all p-values $<0.001$ ). Compared to the control group (indoor air), the  
331 difference of the TVOC change rate was statistically significant for endotoxin (t-test,  
332 p-value=0.0147). The observed differences from the ricin and endotoxin exposures  
333 could be due to different mechanisms initiated by different substances involved. Ricin  
334 is derived from plant, while endotoxin is from Gram-negative bacterial membrane.  
335 They could interact differently with relevant human respiratory or other body cells.

336

337 After exposure to gaseous toxicants such as ozone and carbon dioxide, the levels  
338 of TVOCs in the exposure chamber with rats were observed to have increased  
339 significantly, as observed in Figure 2. As can be seen from the figure, the TVOC levels  
340 has increased for about 44-110% for ozone and about 109-265% for carbon dioxide  
341 exposure (Mann-Whitney Rank Sum Test, all p-values<0.001). The t-test showed that  
342 differences of the TVOC change rates of both ozone and CO<sub>2</sub> exposures compared to  
343 the control group (indoor air) were statistically significant (p-value=0.0219 and 0.0296,  
344 respectively). These data indicated that rat exposure to both ozone and CO<sub>2</sub> has resulted  
345 in significant elevations of TVOCs, suggesting rats were actively responding to the  
346 exposure challenges. The behavior observation from a video also indicated that rats  
347 after the exposure to O<sub>3</sub> seemed to be suffering from the challenge (Video S1,  
348 Supporting Information).

349

### 350 *Changes in exhaled VOCs after exposure to different toxicants*

351 In order to determine the changes of VOC species exhaled out by rats before and  
352 after the exposures to four different substances, the GC-MS/FID method was used to  
353 qualitatively and quantitatively analyze the VOCs in the exposure chamber. The  
354 background indoor air without and with rat in the chamber were first analyzed. A total  
355 of 31 different VOCs were detected and shown in Figure S2 (Supporting Information).  
356 Among detected VOCs as shown in Figure S2 (Supporting Information), the VOCs with  
357 the highest concentrations in indoor air were n-hexane, ethyl acetate and acetone, which  
358 all come from the laboratory air. When rats were placed in the exposure chamber (one  
359 rat at each time), the most abundant VOC species was detected to be acetone, which  
360 was about 4 times more than that of the indoor air background. Statistical tests found  
361 that the concentrations of ethylene and ethane in the chamber containing one rat were



362 significantly lower than that of the background (paired t-test,  $p$ -value $<0.05$ ), which in  
 363 part could be due to the air dilution by the rat's breath.

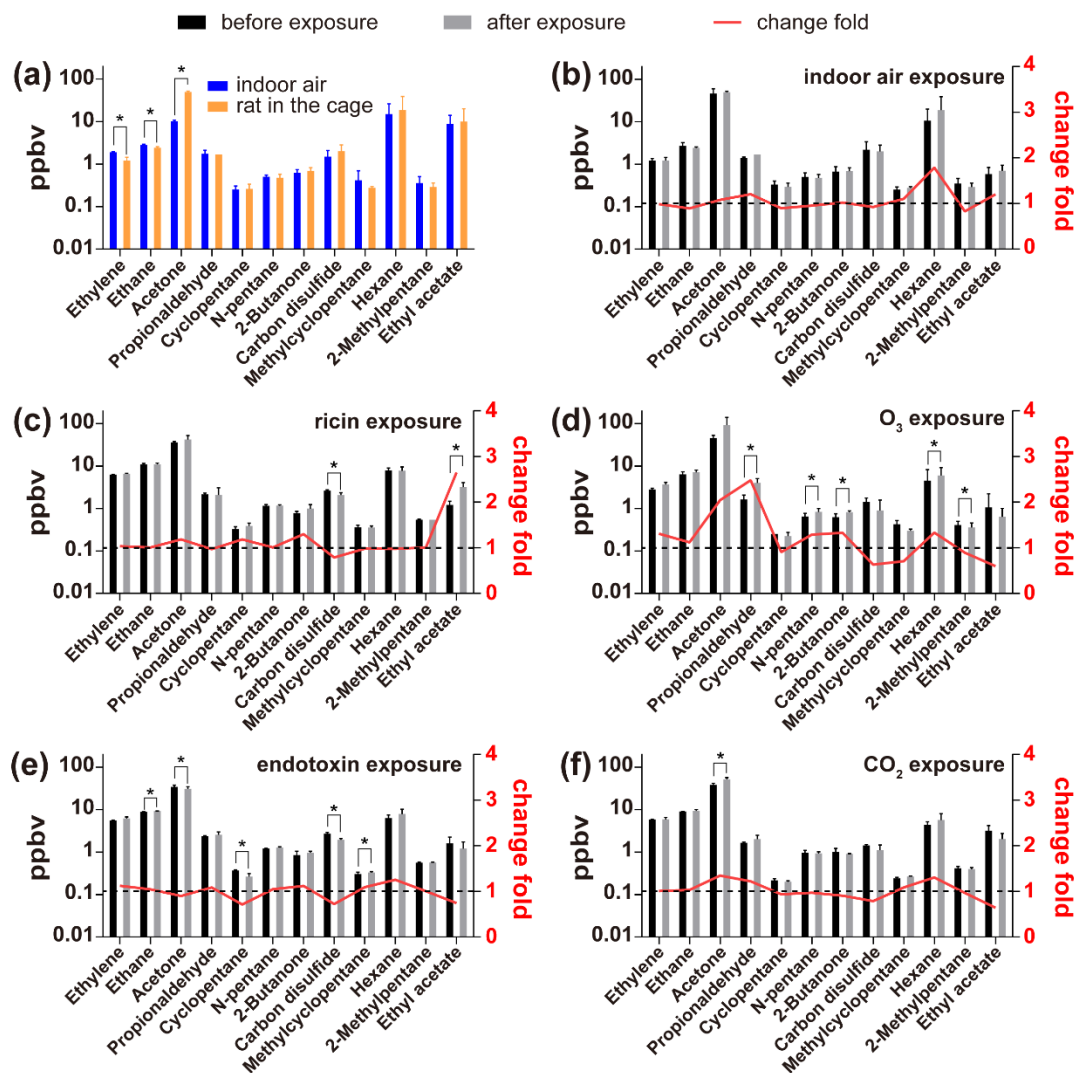

364  
 365 **Figure 3.** Differentiations of VOC species from indoor air and those from the rats'  
 366 exhaled breath under different air toxicity with exposure to ricin, O<sub>3</sub>, endotoxin and  
 367 CO<sub>2</sub>. The red lines show that the average change ratios of every toxicant calculated by  
 368 the level after the exposure divided by the level before exposure (right axis). The dotted  
 369 line is the baseline with a change ratio of 1. “\*” indicates a significant difference at  $p$ -  
 370 value=0.05.

371

372 Differentiations of VOC species from the rat's exhaled breath under different  
373 toxicants exposures were also shown in Figure 3. There were no significant differences  
374 in the concentrations of any VOCs before and after the exposure for the control group,  
375 i.e., indoor air (t-test, p-value=0.05). This suggests that indoor air is relatively less toxic  
376 to a level that is unable to detect a VOC change. In contrast, specific VOC species had  
377 experienced significant changes when rats were exposed to ricin, endotoxin, O<sub>3</sub> and  
378 CO<sub>2</sub> as observed from Figure 3. For example, exposure to ricin caused significant  
379 higher concentration of ethyl acetate (183% higher), while lower concentration of  
380 carbon disulfide (22% lower). As shown in Figure 3, after the endotoxin exposure  
381 process, concentrations of five VOC species: ethane, acetone, cyclopentane, carbon  
382 disulfide and methylcyclopentane were shown to be significantly different with those  
383 of before the exposure (t-test, all p-values<0.05). As can be seen from the results of the  
384 ozone exposure group in Figure 3, the concentrations of propionaldehyde, pentane, 2-  
385 butanone, hexane and 2-methylpentane exhibited significant differences before and  
386 after exposure (t-test, all p-values<0.05), in which all the VOCs except 2-  
387 methylpentane were elevated. In comparison, rat exposure to CO<sub>2</sub> resulted in acetone  
388 level increase by 34% (t-test, p-value=0.0016). These data suggest that exposure to  
389 different toxicants had led to production of different VOC species in addition to their  
390 level changes.

391

### 392 ***Detection of micro RNAs in Blood Samples***

393 To further explore the VOC response mechanism of rats to toxicants exposure,  
394 microRNAs (miRNA) in the blood samples were examined by an RT-qPCR assay. Fold-  
395 changes in microRNA levels after toxicants exposure were shown in Table S2  
396 (Supporting Information). The level of miR-33 in the blood of rats was shown to be

397 significantly lower than that before ricin exposure ( $p$ -value $<0.05$ ); after exposure to  
398 ozone, miR-146a in the blood samples of rats were significantly higher than those  
399 before the exposure ( $p$ -value  $<0.05$ ), while miR-155 was significantly lower than that  
400 before the exposure ( $p$ -value  $<0.05$ ). For other microRNAs as listed in Table S4, the  
401 changes seemed to be insignificant (t-test,  $p$ -values $>0.05$ ).

402

## 403 **4.2 Discussion**

404 As observed from Figure 4, PCA results revealed a clear contrast in breath-borne  
405 VOC profiles of rats between different toxicants exposures. The VOC profiles of the  
406 ozone exposure group was very different from that of the control group (indoor air) and  
407 the VOCs profile of the ricin exposure group was the closest to that of the control group,  
408 which agreed with TVOC level and VOC species profiles obtained above. Overall, the  
409 experiments showed that rats responded differently to different toxicants by releasing  
410 different VOC species owing to different mechanisms of toxicity: ozone caused  
411 significant increases in various breath-borne VOCs; while endotoxin exposure  
412 generally decreased the releasing of VOCs; and ricin and carbon dioxide exposure  
413 resulted in one or two significant VOC species changes. In general, the results of  
414 qualitative and quantitative analysis by the GC-MS/FID method agreed with the TVOC  
415 level monitored by the PID sensor.

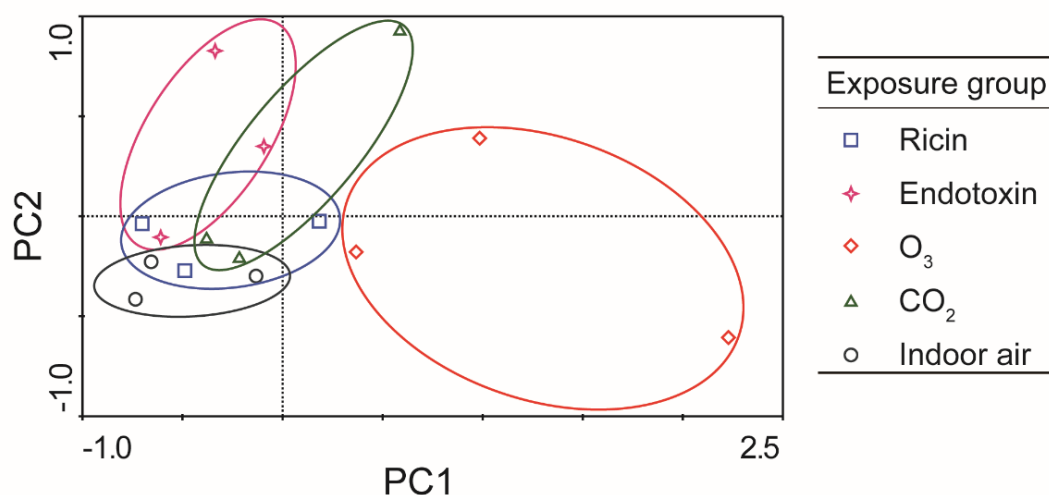

416

417 **Figure 4.** PCA ordinations of exhaled breath-borne VOCs profiles under exposures to  
418 different toxicants: ricin, endotoxin, O<sub>3</sub>, CO<sub>2</sub> and control (indoor air). PC1 and PC2 are  
419 the first and second principal components. The VOCs species involved in the PCA  
420 analysis were the 12 species which were shown to have undergone changes after each  
421 toxicant exposure. Data presented in the figure were from three independent rats  
422 exposed to each toxicant.

423

424 As observed from Figure 3, exposure to ricin caused 183±143% higher  
425 concentration of ethyl acetate, while 22% lower concentration of carbon disulfide. It  
426 was previously reported the concentration of ethyl acetate was significantly higher in  
427 exhaled breath from people with cancer compared to the healthy group . In addition, *in*  
428 *vitro* experiments have shown the human umbilical vein endothelial cells (HUVEC)  
429 can produce ethyl acetate, which is presumably generated by a reaction of ethanol with  
430 acetic acid . It was demonstrated that ricin is not only responsible for the ricin  
431 intoxication through ribosomal inactivation and subsequent inhibition of protein  
432 synthesis and cell death, but also presents endothelial toxicity by acting as a natural  
433 disintegrin binding to and damaging human endothelial cells . Therefore, the toxicity

434 of ricin on the endothelial cells might be the source of the higher concentration of ethyl  
435 acetate observed in this work. As a disease biomarker, carbon disulfide was observed  
436 in the exhaled breath <sup>44-45</sup>. Recently, it was suggested that the carbon disulfide may be  
437 generated endogenously and play a role as a bioregulator <sup>46</sup>. Here, we observed that  
438 exposure to both ricin and endotoxin resulted in lower levels of breath-borne carbon  
439 disulfide compared to the control.

440

441 For CO<sub>2</sub> and endotoxin exposure, the observation for acetone was the opposite as  
442 shown in Figure 3. Acetone in exhaled breath was widely investigated in many studies  
443 as an important biomarker related to blood glucose and diabetes . Acetone is produced  
444 in the fatty acids metabolism by hepatocytes via decarboxylation of excess acetyl  
445 coenzyme A (Acetyl-CoA), and then oxidized via the Krebs cycle in peripheral tissue .  
446 As shown in Figure 3, the acetone level increased by 34±9% as a result of CO<sub>2</sub> exposure,  
447 suggesting CO<sub>2</sub> caused hypoxia in rats, and led to increased respiration from rats. These  
448 increases in acetone level corresponded to TVOC level increase as determined by the  
449 PID sensor after the exposure to CO<sub>2</sub>. However, when exposed to endotoxin, the  
450 acetone level in the exposure chamber decreased by about 10±6%, indicating that the  
451 respiration of the rats may be attenuated by the exposure of endotoxin. Clearly, the  
452 involved mechanisms by which endotoxin and CO<sub>2</sub> cause health effects to rats could be  
453 very different.

454

455 As observed in Figure 3, the increase of ethane level by endotoxin exposure  
456 suggested that lipid damage was induced by oxidative stress in the rat's body since  
457 ethane is acknowledged as a marker of lipid peroxidation and described to be generated  
458 by peroxidation of ω-3 polyunsaturated fatty acids . In addition to ethane, the increase

459 of methylcyclopentane level as shown in Figure 3 might also be the result of the  
460 endotoxin exposure. Endotoxin has been shown to trigger inflammation through its  
461 interaction with the TLR4/CD14/MD2 receptor and then initiates a signal cascade. This  
462 reaction correspondingly results in the activation of transcription factor such as NF- $\kappa$ B  
463 leading to the production of pro-inflammatory cytokines and type 1 interferons (IFNs),  
464 and finally results in systemic inflammatory response syndrome . In general, in terms  
465 with the average fold changes, the concentration of total VOCs in the exhaled breath  
466 was relatively lower after the endotoxin exposure, which agreed with the results of  
467 TVOC obtained by the PID sensors.

468

469 In addition to these biologicals, we have also shown that exposure to chemicals  
470 such as ozone and CO<sub>2</sub> also resulted in in-vivo changes in VOC levels. From the fold  
471 changes of various VOC species such as propionaldehyde, N-pentane, 2-Butanone, and  
472 Hexane, the ozone exposure has resulted in an overall increase of VOCs in rats' exhaled  
473 breath, which agreed with the TOVC monitoring shown in Figure 2 by the PID sensors.  
474 It was previously indicated that increase in propionaldehydes, further products of lipid  
475 peroxidation, indicated more severe oxidative damage in rats following exposure to  
476 ozone . Ozone was described as a strong oxidizing agent, and can cause intracellular  
477 oxidative stress through ozonide and hydroperoxide formation . The mechanism of  
478 ozone oxidative damage involves the activation of Nrf2, heat shock protein 70, NF- $\kappa$ B,  
479 thus increasing expression of a range of proinflammatory cytokines such as TNF $\alpha$  and  
480 interleukin 1 $\beta$ , and chemokines such as interleukin 8 . The results above show that  
481 regardless of toxicant types breath-borne VOC from rats experienced *in vivo* changes.

482

483 In this work, miRNAs from rats' blood were also analyzed as shown in Table S4

484 to investigate the VOC emission mechanism by rats upon exposure to various types of  
485 toxicants. miRNAs are short non-coding RNA sequences that regulate gene expression  
486 at the posttranscriptional level; and many miRNAs have already been identified to  
487 influence physiological processes such as immune reaction, adaptation to stress, and  
488 widely investigated in environmental exposure studies . Among these microRNAs,  
489 miR-125b, miR-155, miR-146a, and miR-21 are mainly shown to regulate oxidative  
490 stress and inflammatory processes *in vivo*, and widely investigated in air pollution  
491 related studies . For example, among them, miR-155 has a positive regulation function,  
492 and the other three are negative regulation . However, in this study, the ozone exposure  
493 resulted in decreased levels of miR-155, which are contrary to previous reports in the  
494 literature . The specific reasons need further investigations. Previous studies have  
495 shown that miR-20b and miR-210 are hypoxia regulators in animals, and miR-122 and  
496 miR-33 are mainly responsible for regulating lipid metabolism and glucose metabolism  
497 in the body . However, these microRNAs were shown to have not undergone significant  
498 changes in this study after the exposures to four different toxicants. The possible reason  
499 may be that microRNAs act as post-transcriptional regulators by degrading mRNA or  
500 inhibiting their translation , thus failing to respond in a timely manner during short-term  
501 exposure (10 min used here for taking blood samples). Nonetheless, observed changes  
502 in microRNA levels after the toxicant exposure are related to those VOC level and  
503 species changes.

504

505 The experimental results here showed that the indoor air supply to the rats in the  
506 exposure chamber did not cause obvious changes in the TVOC level. This indicated  
507 that the indoor air exhaled by the rats were relatively less toxic, for example, unable to  
508 induce a detectable TOC change from exhaled breath. When exposed to aerosolized

509 ricin of the tested amount for 10 mins, the TVOC did not change significantly; while  
510 the endotoxin exposure resulted in lower TVOC levels. In contrast, when exposed to  
511 ozone or CO<sub>2</sub> the TVOC levels were shown to have increased by more than 200%.  
512 Clearly, these results indicate that when rats are exposed to toxic substances their  
513 certain metabolic activities are immediately affected, i.e., these exposures promoted or  
514 inhibited specific VOC productions. Based on the results we obtained from this work,  
515 the following VOC emission mechanisms of rats when exposed to different toxicants  
516 are proposed and illustrated in Figure 5. Previously, it was suggested that VOCs are  
517 produced during the normal metabolism in the body; while pathological processes, such  
518 as metabolic disorders, can also produce new species of VOCs or alter the levels of  
519 existing VOCs . Therefore, cell or tissue injuries caused by external toxicants exposure  
520 also can alter the exhaled VOCs profile by disturbing the normal process. The exact  
521 toxic effect mechanism as observed from this work could vary from one toxicant to  
522 another. For some pollutants such as endotoxin and ricin, there are specific receptors to  
523 recognize them and then start the chain of responses or reactions . Among these various  
524 mechanisms, the ROS (reactive oxygen species) and oxidative stress are recognized to  
525 be the central and the common mechanism in various forms of pathophysiology, as well  
526 as the health effect of various air pollutants including ambient particulate matter (PM) .  
527 Oxidative stress is essentially a compensatory state of the body and can trigger redox-  
528 sensitive pathways leading to different biological processes such as inflammation and  
529 cell death . For example, the strong oxidants such as ozone might cause oxidative stress  
530 through direct effects on lipids and proteins , which mostly caused the generation and  
531 release of hydrocarbons and aldehydes, such as ethane, ethylene, and propionaldehyde .  
532 While carbon dioxide tends to make the redox balance tilted toward the reduction side  
533 by reducing oxygen supply and thus influencing the energy metabolism in cells . For



534 ricin and endotoxin exposure, the underlying mechanisms seem to be different from  
 535 ozone and CO<sub>2</sub>, and they could cause oxidative stress indirectly through the activation  
 536 of intracellular oxidant pathways. Nonetheless, all toxicants share a common effect of  
 537 disrupting the redox balance, and thus interfere with normal biochemical reactions or  
 538 cause material damage in cells, accordingly changing the VOC profile and releasing  
 539 into the breath. As discussed above, in this work, the VOCs profile of rats changed  
 540 significantly after exposure to different toxicants. Therefore, regardless of toxicant  
 541 types, breath-borne VOCs from the rats seem to be capable of serving as a proxy for  
 542 real-time monitoring air toxicity.

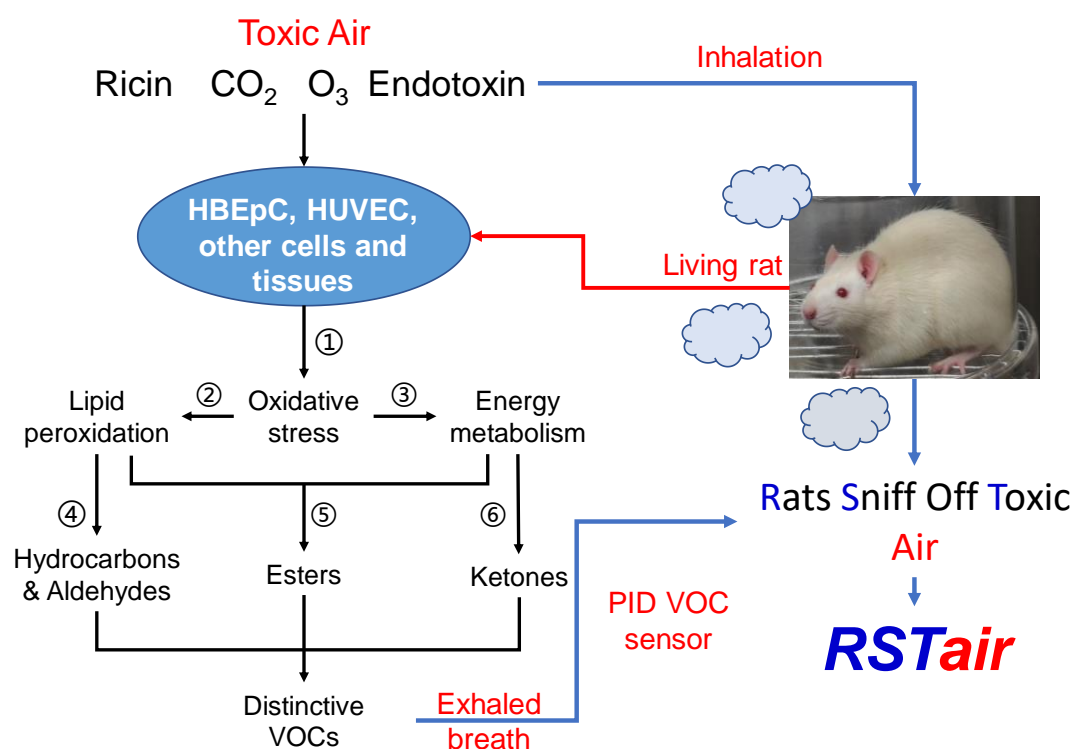

543

544 **Figure 5.** Proposed mechanisms of toxic effects and VOCs releasing in rats when  
 545 exposed to the environmental toxicants via inhalation. The black arrows represent the  
 546 toxic effects of different toxicants and the possible pathways of VOCs generation. The  
 547 blue arrows stand for the principle and working process of the invented RSTair system  
 548 for real-time air toxicity monitoring. The corresponding references cited are: ① <sup>59</sup>; ②

549 68; ③ 62; ④ 48; ⑤ 42; ⑥ 48, 69.

550

## 551 5. Conclusions

552 Recently, exhaled VOCs have increasingly been used as non-invasive samples for  
553 exposure studies as well as clinical diagnosis. In this study, we examined the possibility  
554 of using living animals' exhaled VOCs in real-time monitoring air toxicity. Our  
555 experimental data showed that when the rats were exposed to air containing various  
556 toxicants, characteristic VOC profiles were *in vivo* produced in the body within 10  
557 minutes or shorter, and further emitted via exhaled breath. In addition, different toxicant  
558 exposures were shown to have caused productions of distinctive profiles of VOC  
559 species from the living rats. Therefore, the developed *RSTair* system, i.e., by integrating  
560 inhalation exposure, living rats, breath sampling and online VOC sensor, was capable  
561 of real-time monitoring toxic air. The *RSTair* system can detect a breath-borne VOC  
562 change when the air is becoming toxic to rats. In doing so, the system can real-time  
563 alter people of possible air toxicity change or hazardous air. Nonetheless, the PID sensor  
564 used in this system only reports the TVOC level without classifying individual VOC  
565 species. It should be also noted that the PID sensor responds to different VOCs  
566 differently. For example, the PID could respond to one VOC with stronger signal, but  
567 to another with weaker one even for the same concentration level. However, this can be  
568 readily remedied by using portable direct-injection mass spectrum such as Proton  
569 Transfer Reaction-Mass Spectrometry (PTR-MS). This study revealed that living  
570 systems such as rats will *in vivo* alter specific VOC productions in response to external  
571 toxicant exposure challenges from air. By using this discovered fundamental science,  
572 the invented *RSTair* system here showed its great promise of revolutionizing the air  
573 toxicity monitoring, and providing significant technological advances for air security

574 in related fields such as military defense, customs, counter-terrorism and security

575 assurances for important events or special locations.

576

577 **Acknowledgements**

578 This study was supported by the NSFC Distinguished Young Scholars Fund

579 Awarded to M. Yao (21725701), and the Ministry of Science and Technology

580 (2016YFC0207102 and 2015DFG92040).

581

582 **Conflict of interests**

583 The authors declare no competing financial interest.

584

## 585 **References**

- 586 1. Brook, R. D.; Rajagopalan, S.; Pope, C. A., III, et al., Particulate Matter Air  
587 Pollution and Cardiovascular Disease An Update to the Scientific Statement From the  
588 American Heart Association. *Circulation* **2010**, *121* (21), 2331-2378.
- 589 2. Cohen, A. J.; Brauer, M.; Burnett, R., et al., Estimates and 25-year trends of the  
590 global burden of disease attributable to ambient air pollution: an analysis of data from  
591 the Global Burden of Diseases Study 2015. *Lancet* **2017**, *389* (10082), 1907.
- 592 3. Forouzanfar, M. H.; Afshin, A.; Alexander, L. T., et al., Global, regional, and  
593 national comparative risk assessment of 79 behavioural, environmental and  
594 occupational, and metabolic risks or clusters of risks, 1990-2015: a systematic analysis  
595 for the Global Burden of Disease Study 2015. *Lancet* **2016**, *388* (10053), 1659-1724.
- 596 4. EPA, U. S., Integrated Science Assessment (ISA) of Ozone and Related  
597 Photochemical Oxidants (Final Report, Feb 2013). Agency, U. S. E. P., Ed. Washington,  
598 DC, 2013; Vol. EPA/600/R-10/076F.
- 599 5. Jerrett, M.; Burnett, R. T.; Pope III, C. A., et al., Long-term ozone exposure and  
600 mortality. *N. Engl. J. Med.* **2009**, *360* (11), 1085-1095.
- 601 6. Thompson, W. W.; Shay, D. K.; Weintraub, E., et al., Mortality Associated With  
602 Influenza and Respiratory Syncytial Virus in the United States. *JAMA* **2003**, *289* (2),  
603 179-186.
- 604 7. Jones, R. M.; Brosseau, L. M., Aerosol transmission of infectious disease. *J. Occup.*  
605 *Environ. Med.* **2015**, *57* (5), 501-508.
- 606 8. Fernstrom, A.; Goldblatt, M., Aerobiology and its role in the transmission of  
607 infectious diseases. *J Pathog* **2013**, *2013*.
- 608 9. Yu, I. T. S.; Li, Y.; Wong, T. W., et al., Evidence of Airborne Transmission of the  
609 Severe Acute Respiratory Syndrome Virus. *N. Engl. J. Med.* **2004**, *350* (17), 1731-1739.

- 610 10. Green, M. S.; LeDuc, J.; Cohen, D., et al., Confronting the threat of bioterrorism:  
611 realities, challenges, and defensive strategies. *Lancet Infect Dis* **2019**, *19* (1), e2-e13.
- 612 11. Okumura, T.; Takasu, N.; Ishimatsu, S., et al., Report on 640 Victims of the Tokyo  
613 Subway Sarin Attack. *Ann. Emerg. Med.* **1996**, *28* (2), 129-135.
- 614 12. Jernigan, D. B.; Raghunathan, P. L.; Bell, B. P., et al., Investigation of bioterrorism-  
615 related anthrax, United States, 2001: epidemiologic findings. *Emerg. Infect. Dis.* **2002**,  
616 *8* (10), 1019.
- 617 13. Marć, M.; Tobiszewski, M.; Zabiegała, B., et al., Current air quality analytics and  
618 monitoring: A review. *Anal. Chim. Acta* **2015**, *853*, 116-126.
- 619 14. Sameenoi, Y.; Koehler, K.; Shapiro, J., et al., Microfluidic Electrochemical Sensor  
620 for On-Line Monitoring of Aerosol Oxidative Activity. *J. Am. Chem. Soc.* **2012**, *134*  
621 (25), 10562-10568.
- 622 15. Ishihara, S.; Azzarelli, J. M.; Krikorian, M., et al., Ultratrace Detection of Toxic  
623 Chemicals: Triggered Disassembly of Supramolecular Nanotube Wrappers. *J. Am.*  
624 *Chem. Soc.* **2016**, *138* (26), 8221-8227.
- 625 16. Azzarelli, J. M.; Mirica, K. A.; Ravnsbæk, J. B., et al., Wireless gas detection with  
626 a smartphone via rf communication. *Proc. Natl. Acad. Sci.* **2014**, *111* (51), 18162.
- 627 17. Jung, J. H.; Park, S. Y.; Lee, J. E., et al., Distinguishing biotic and abiotic particles  
628 using an ultraviolet aerodynamic particle sizer for real-time detection of bacterial  
629 bioaerosols. *Environ. Eng. Sci.* **2012**, *29* (9), 866-874.
- 630 18. Schwarzmeier, K.; Knauer, M.; Ivleva, N. P., et al., Bioaerosol analysis based on a  
631 label-free microarray readout method using surface-enhanced Raman scattering. *Anal.*  
632 *Bioanal. Chem.* **2013**, *405* (16), 5387-5392.
- 633 19. Shen, F.; Wang, J.; Xu, Z., et al., Rapid flu diagnosis using silicon nanowire sensor.  
634 *Nano Lett.* **2012**, *12* (7), 3722-3730.

- 635 20. Jin, L.; Xie, J.; Wong, C. K. C., et al., Contributions of City-Specific Fine  
636 Particulate Matter (PM<sub>2.5</sub>) to Differential In Vitro Oxidative Stress and Toxicity  
637 Implications between Beijing and Guangzhou of China. *Environ. Sci. Technol.* **2019**,  
638 53 (5), 2881-2891.
- 639 21. Li, J.; Chen, H.; Li, X., et al., Differing toxicity of ambient particulate matter (PM)  
640 in global cities. *Atmos. Environ.* **2019**, 212, 305-315.
- 641 22. Pleil, J. D., Breath biomarkers in toxicology. *Arch. Toxicol.* **2016**, 90 (11), 2669-  
642 2682.
- 643 23. Council, N. R. *Sensor systems for biological agent attacks: protecting buildings*  
644 *and military bases*; 030909576X; National Academies Press: 2005.
- 645 24. Kida, H.; Fukutani, Y.; Mainland, J. D., et al., Vapor detection and discrimination  
646 with a panel of odorant receptors. *Nat Commun* **2018**, 9 (1), 4556.
- 647 25. Rider, T. H.; Petrovick, M. S.; Nargi, F. E., et al., A B Cell-Based Sensor for Rapid  
648 Identification of Pathogens. *Science* **2003**, 301 (5630), 213.
- 649 26. Engel, Y.; Elnathan, R.; Pevzner, A., et al., Supersensitive Detection of Explosives  
650 by Silicon Nanowire Arrays. *Angew. Chem. Int. Ed.* **2010**, 49 (38), 6830-6835.
- 651 27. Chen, H.; Li, J.; Zhang, X., et al., Automated in Vivo Nanosensing of Breath-Borne  
652 Protein Biomarkers. *Nano Lett.* **2018**, 18 (8), 4716-4726.
- 653 28. Vereb, H.; Dietrich, A. M.; Alfeeli, B., et al., The Possibilities Will Take Your  
654 Breath Away: Breath Analysis for Assessing Environmental Exposure. *Environ. Sci.*  
655 *Technol.* **2011**, 45 (19), 8167-8175.
- 656 29. Haick, H.; Broza, Y. Y.; Mochalski, P., et al., Assessment, origin, and  
657 implementation of breath volatile cancer markers. *Chem. Soc. Rev.* **2014**, 43 (5), 1423-  
658 1449.
- 659 30. Li, X.; Sinues, P. M. L.; Dallmann, R., et al., Drug Pharmacokinetics Determined

- 660 by Real-Time Analysis of Mouse Breath. *Angew. Chem. Int. Edit.* **2015**, *54* (27), 7815-  
661 7818.
- 662 31. Broza, Y. Y.; Mochalski, P.; Ruzsanyi, V., et al., Hybrid Volatolomics and Disease  
663 Detection. *Angew. Chem. Int. Edit.* **2015**, *54* (38), 11036-11048.
- 664 32. Wang, F.; Swager, T. M., Diverse Chemiresistors Based upon Covalently Modified  
665 Multiwalled Carbon Nanotubes. *J. Am. Chem. Soc.* **2011**, *133* (29), 11181-11193.
- 666 33. Aghdassi, E.; Allard, J. P., Breath alkanes as a marker of oxidative stress in different  
667 clinical conditions. *Free Radic. Biol. Med.* **2000**, *28* (6), 880-886.
- 668 34. Righettoni, M.; Tricoli, A.; Pratsinis, S. E., Si:WO<sub>3</sub> Sensors for Highly Selective  
669 Detection of Acetone for Easy Diagnosis of Diabetes by Breath Analysis. *Anal. Chem.*  
670 **2010**, *82* (9), 3581-3587.
- 671 35. Peng, G.; Tisch, U.; Adams, O., et al., Diagnosing lung cancer in exhaled breath  
672 using gold nanoparticles. *Nat Nanotechnol* **2009**, *4* (10), 669.
- 673 36. Fens, N.; Zwinderman, A. H.; Schee, M. P. v. d., et al., Exhaled Breath Profiling  
674 Enables Discrimination of Chronic Obstructive Pulmonary Disease and Asthma. *Am. J.*  
675 *Respir. Crit. Care Med.* **2009**, *180* (11), 1076-1082.
- 676 37. Ahmed, W. M.; Lawal, O.; Nijsen, T. M., et al., Exhaled Volatile Organic  
677 Compounds of Infection: A Systematic Review. *ACS Infect Dis* **2017**, *3* (10), 695-710.
- 678 38. Zhang, X.; Kang, J.; Chen, H., et al., PM<sub>2.5</sub> Meets Blood: In vivo Damages and  
679 Immune Defense. *Aerosol Air Qual Res* **2018**, *18*, 456-470.
- 680 39. Wei, K.; Li, W.; Gao, S., et al., Inactivation of Ricin Toxin by Nanosecond Pulsed  
681 Electric Fields Including Evidences from Cell and Animal Toxicity. *Sci. Rep.* **2016**, *6*,  
682 18781.
- 683 40. Buszewski, B.; Ligor, T.; Jezierski, T., et al., Identification of volatile lung cancer  
684 markers by gas chromatography–mass spectrometry: comparison with discrimination

- 685 by canines. *Anal. Bioanal. Chem.* **2012**, *404* (1), 141-146.
- 686 41. Amal, H.; Leja, M.; Funke, K., et al., Breath testing as potential colorectal cancer  
687 screening tool. *Int. J. Cancer* **2016**, *138* (1), 229-236.
- 688 42. Mochalski, P.; Theurl, M.; Sponring, A., et al., Analysis of Volatile Organic  
689 Compounds Liberated and Metabolised by Human Umbilical Vein Endothelial Cells  
690 (HUVEC) In Vitro. *Cell Biochem. Biophys.* **2015**, *71* (1), 323-329.
- 691 43. Machesky, N. J.; Rusnak, J. M.; Moore, E. H., et al., Development of a highly  
692 sensitive in vitro endothelial cell toxicity assay for evaluating ricin toxin A chain-based  
693 vaccines or therapeutics. *Toxicon* **2019**, *167*, 152-161.
- 694 44. Fernández del Río, R.; O'Hara, M. E.; Holt, A., et al., Volatile Biomarkers in Breath  
695 Associated With Liver Cirrhosis — Comparisons of Pre- and Post-liver Transplant  
696 Breath Samples. *EBioMedicine* **2015**, *2* (9), 1243-1250.
- 697 45. Daniel, D. A. P.; Thangavel, K., Breathomics for Gastric Cancer Classification  
698 Using Back-propagation Neural Network. *J Med Signals Sens* **2016**, *6* (3), 172-182.
- 699 46. DeMartino, A. W.; Zigler, D. F.; Fukuto, J. M., et al., Carbon disulfide. Just toxic  
700 or also bioregulatory and/or therapeutic? *Chem. Soc. Rev.* **2017**, *46* (1), 21-39.
- 701 47. Cao, W.; Duan, Y., Breath Analysis: Potential for Clinical Diagnosis and Exposure  
702 Assessment. *Clin. Chem.* **2006**, *52* (5), 800-811.
- 703 48. Miekisch, W.; Schubert, J. K.; Noeldge-Schomburg, G. F. E., Diagnostic potential  
704 of breath analysis—focus on volatile organic compounds. *Clin. Chim. Acta* **2004**, *347*  
705 (1), 25-39.
- 706 49. Wang, X.; Quinn, P. J., *Endotoxins: structure, function and recognition*. Springer  
707 Science & Business Media: 2010; Vol. 53.
- 708 50. Traxler, S.; Bischoff, A.-C.; Saß, R., et al., VOC breath profile in spontaneously  
709 breathing awake swine during Influenza A infection. *Sci. Rep.* **2018**, *8* (1), 14857-14857.



- 710 51. Lodovici, M.; Bigagli, E., Oxidative stress and air pollution exposure. *J. Toxicol.*  
711 **2011**, *2011*, 487074-487074.
- 712 52. Nichols, B. G.; Woods, J. S.; Luchtel, D. L., et al., Effects of ozone exposure on  
713 nuclear factor- $\kappa$ B activation and tumor necrosis factor- $\alpha$  expression in human nasal  
714 epithelial cells. *Toxicol. Sci.* **2001**, *60* (2), 356-362.
- 715 53. Vrijens, K.; Bollati, V.; Nawrot Tim, S., MicroRNAs as Potential Signatures of  
716 Environmental Exposure or Effect: A Systematic Review. *Environ. Health Perspect.*  
717 **2015**, *123* (5), 399-411.
- 718 54. Wei, J.; Li, F.; Yang, J., et al., MicroRNAs as regulators of airborne pollution-  
719 induced lung inflammation and carcinogenesis. *Arch. Toxicol.* **2015**, *89* (5), 677-685.
- 720 55. Deshpande, D.; Dileepan, M.; Walseth, T., et al., MicroRNA Regulation of Airway  
721 Inflammation and Airway Smooth Muscle Function: Relevance to Asthma. *Drug Dev.*  
722 *Res.* **2015**, *76* (6), 286-295.
- 723 56. Kong, A. P. S.; Xiao, K.; Choi, K. C., et al., Associations between microRNA (miR-  
724 21, 126, 155 and 221), albuminuria and heavy metals in Hong Kong Chinese  
725 adolescents. *Clin. Chim. Acta* **2012**, *413* (13), 1053-1057.
- 726 57. Huang, X.; Le, Q.-T.; Giaccia, A. J., MiR-210 – micromanager of the hypoxia  
727 pathway. *Trends Mol. Med.* **2010**, *16* (5), 230-237.
- 728 58. Aranda, J. F.; Madrigal-Matute, J.; Rotllan, N., et al., MicroRNA modulation of  
729 lipid metabolism and oxidative stress in cardiometabolic diseases. *Free Radic. Biol.*  
730 *Med.* **2013**, *64*, 31-39.
- 731 59. Hakim, M.; Broza, Y. Y.; Barash, O., et al., Volatile Organic Compounds of Lung  
732 Cancer and Possible Biochemical Pathways. *Chem. Rev.* **2012**, *112* (11), 5949-5966.
- 733 60. Lord, M. J.; Jolliffe, N. A.; Marsden, C. J., et al., Ricin: Mechanisms of  
734 Cytotoxicity. *Toxicol. Rev.* **2003**, *22* (1), 53-64.

- 735 61. Hybertson, B. M.; Gao, B.; Bose, S. K., et al., Oxidative stress in health and disease:  
736 The therapeutic potential of Nrf2 activation. *Mol. Aspects Med.* **2011**, *32* (4), 234-246.
- 737 62. Maritim, A. C.; Sanders, R. A.; Watkins III, J. B., Diabetes, oxidative stress, and  
738 antioxidants: A review. *J. Biochem. Mol. Toxicol.* **2003**, *17* (1), 24-38.
- 739 63. Birben, E.; Sahiner, U. M.; Sackesen, C., et al., Oxidative stress and antioxidant  
740 defense. *World Allergy Organ J* **2012**, *5* (1), 9-19.
- 741 64. Kosmider, B.; Loader, J. E.; Murphy, R. C., et al., Apoptosis induced by ozone and  
742 oxysterols in human alveolar epithelial cells. *Free Radic. Biol. Med.* **2010**, *48* (11),  
743 1513-1524.
- 744 65. Amann, A.; Costello, B. d. L.; Miekisch, W., et al., The human volatilome: volatile  
745 organic compounds (VOCs) in exhaled breath, skin emanations, urine, feces and saliva.  
746 *J. Breath Res.* **2014**, *8* (3), 034001.
- 747 66. Vander Heiden, M. G.; Cantley, L. C.; Thompson, C. B., Understanding the  
748 Warburg effect: the metabolic requirements of cell proliferation. *Science (New York,*  
749 *N.Y.)* **2009**, *324* (5930), 1029-1033.
- 750 67. Hochachka, P. W., Defense strategies against hypoxia and hypothermia. *Science*  
751 **1986**, *231* (4735), 234.
- 752 68. Filipiak, W.; Ruzsanyi, V.; Mochalski, P., et al., Dependence of exhaled breath  
753 composition on exogenous factors, smoking habits and exposure to air pollutants. *J.*  
754 *Breath Res.* **2012**, *6* (3), 21.
- 755 69. Laffel, L., Ketone bodies: a review of physiology, pathophysiology and application  
756 of monitoring to diabetes. *Diabetes Metab. Res. Rev.* **1999**, *15* (6), 412-426.
- 757
- 758

759

## Supporting Information

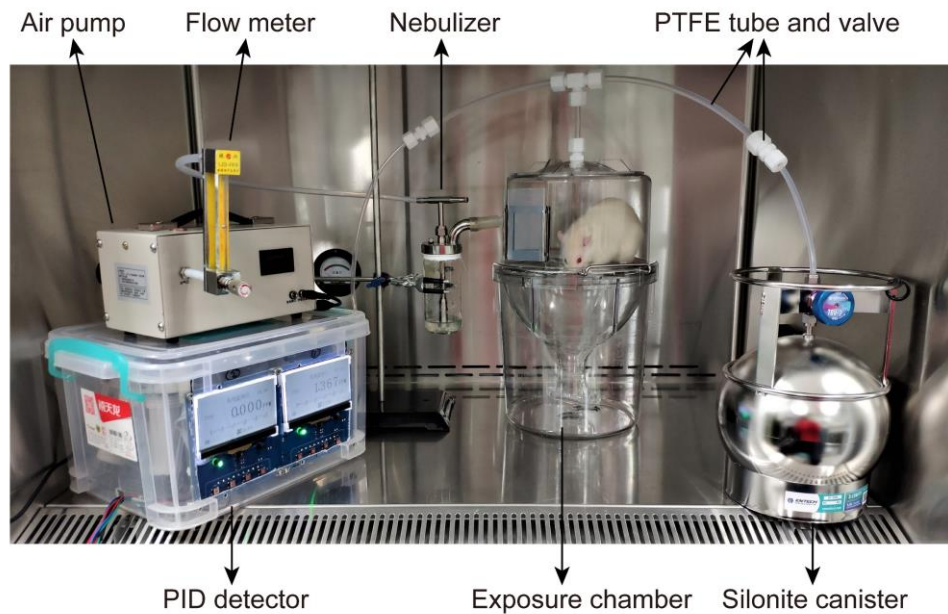

760

761 **Figure S1.** Experimental setup (RSTair) for measuring total VOCs from the rats with

762 and without different toxicant exposures.

763

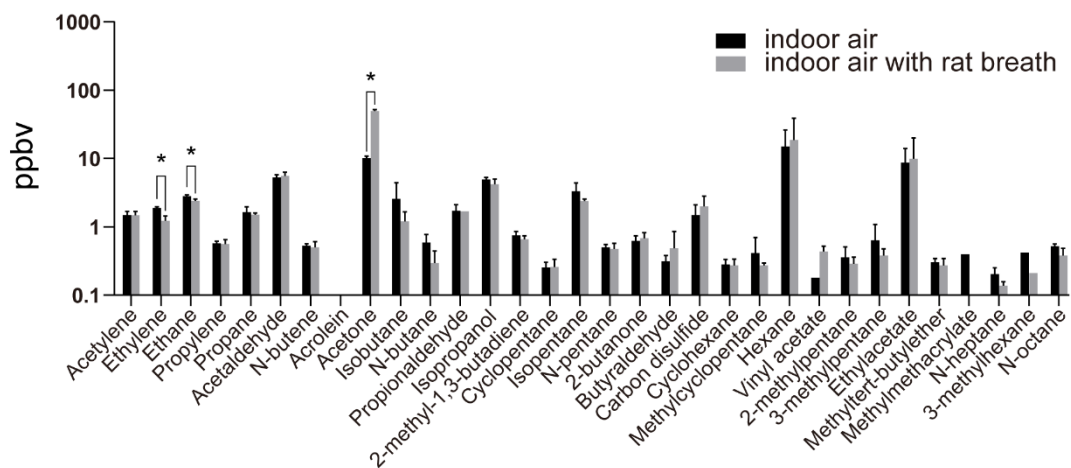

764

765 **Figure S2.** Differentiations of VOC species from indoor air and those from rats'

766 exhaled breath. The data represent average levels of three independent experiments,

767 and error bars stand for the standard deviations. "\*" indicates a statistically significant

768 difference at p-value = 0.05.

769

770 **Table S1** Primers used for RT-qPCR analysis of microRNA. The reverse primers are  
 771 included in the TIANGEN® miRcute Plus miRNA qPCR Kit (SYBR Green) (Code No.  
 772 FP411).

| microRNA    | Forward primers         |
|-------------|-------------------------|
| MIR-122-5P  | GAGTGTGACAATGGTGTGTTG   |
| MIR-125B-5P | CCTGAGACCCTAACTTGTGA    |
| MIR-146A-5P | GAGAACTGAATTCATGGGTT    |
| MIR-155     | TAATGCTAATCGTGATAGGGGTT |
| MIR-20B     | AGTGCTCATAGTGCAGGTAG    |
| MIR-210     | CCTGCCACCGCACACTG       |
| MIR-21-5P   | AGCTTATCAGACTGATGTTGA   |
| MIR-33      | GCATTGTAGTTGCATTGCA     |

773

774 **Table S2** Expression level changes (before and after the exposure) of microRNA levels  
 775 in blood samples from rats before and after exposure to ricin, O<sub>3</sub>, endotoxin and CO<sub>2</sub>.  
 776 The blood samples were taken before exposure and 10 minutes after exposure. SD  
 777 represents a standard deviation value. “\*” indicates significant difference at p-  
 778 value=0.05.

| microRNA | Ricin                   |      | Endotoxin               |      | Ozone                   |      | Carbon dioxide          |      |
|----------|-------------------------|------|-------------------------|------|-------------------------|------|-------------------------|------|
|          | Expression level change | SD   | Expression level change | SD   | Expression level change | SD   | Expression level change | SD   |
| miR-122  | 1.03                    | 2.73 | -0.70                   | 0.19 | 5.22                    | 8.50 | -0.27                   | 0.41 |
| miR-125b | 1.04                    | 2.74 | 1.85                    | 4.21 | 0.87                    | 1.66 | -0.26                   | 0.17 |
| miR-146a | 0.37                    | 1.14 | -0.37                   | 0.59 | 0.52*                   | 0.26 | 0.48                    | 0.71 |
| miR-155  | 2.59                    | 3.47 | 4.24                    | 5.01 | -0.47*                  | 0.07 | -0.26                   | 0.04 |
| miR-20b  | -0.53                   | 0.47 | -0.81                   | 0.16 | 0.48                    | 0.69 | 0.65                    | 0.64 |
| miR-210  | 0.24                    | 1.66 | -0.68                   | 0.33 | 2.07                    | 2.69 | 0.12                    | 0.17 |
| miR-21   | 0.46                    | 1.77 | -0.36                   | 0.55 | -0.11                   | 0.59 | 0.65                    | 0.46 |
| miR-33   | -0.43*                  | 0.17 | -0.60                   | 0.35 | 1.64                    | 2.17 | 0.23                    | 0.30 |

779

780 **Video S1.** Video clip of rat with the exposure to ozone for 10 minutes.

781
