1  
2  
3  
4  
5  
6  
7  
8  
9  
10  
11  
12  
13  
14  
15  
16  
17  
18  
19  
20  
21  
22

# Rats Sniff off Toxic Air

Haoxuan Chen<sup>#</sup>, Xinyue Li<sup>#</sup> and Maosheng Yao\*

State Key Joint Laboratory of Environmental Simulation and Pollution Control,  
College of Environmental Sciences and Engineering, Peking University, Beijing  
100871, China

**Corresponding author:**

Maosheng Yao, PhD  
Boya Distinguished Professor  
State Key Joint Laboratory of Environmental Simulation and Pollution Control,  
College of Environmental Sciences and Engineering, Peking University, Beijing  
100871, China  
Email: yao@pku.edu.cn, Ph: +86 01062767282

# Both authors contributed equally

Beijing, China  
January 2020

23  
24  
25  
26  
27  
28  
29  
30  
31  
32  
33  
34

## TOC

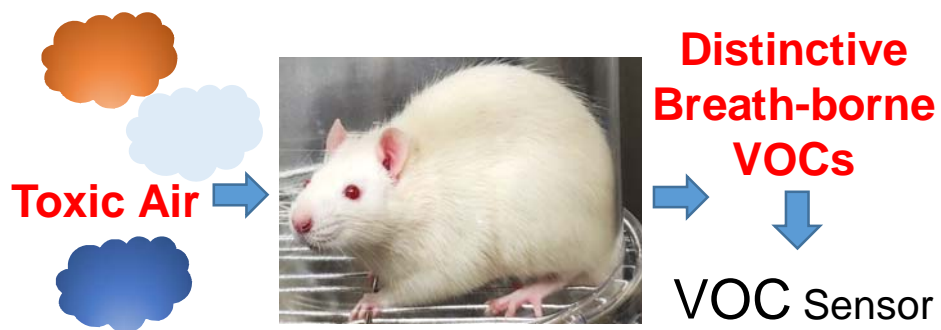

Rat Sniff Off Toxic Air  
(*RSTair*)

35

36 **Abstract**

37 Breathing air is a fundamental human need, yet its safety, when challenged by  
38 various harmful or lethal substances, is often not properly guarded. For example, air  
39 toxicity is currently monitored only for single or limited number of known toxicants,  
40 thus failing to fully warn against possible hazardous air. Here, we discovered that  
41 within minutes living rats emitted distinctive profiles of volatile organic compounds  
42 (VOCs) via breath when exposed to various airborne toxicants such as endotoxin, O<sub>3</sub>,  
43 ricin, and CO<sub>2</sub>. Compared to background indoor air, when exposed to ricin or  
44 endotoxin aerosols breath-borne VOC levels, especially that of carbon disulfide, were  
45 shown to decrease; while their elevated levels were observed for O<sub>3</sub> and CO<sub>2</sub>  
46 exposures. A clear contrast in breath-borne VOCs profiles of rats between different  
47 toxicant exposures was observed with a statistical significance. Differences in  
48 MicroRNA regulations such as miR-33, miR-146a and miR-155 from rats' blood  
49 samples revealed different mechanisms used by the rats in combating different air  
50 toxicant challenges. Similar to dogs, rats were found here to be able to sniff against  
51 toxic air by releasing a specific breath-borne VOC profile. The discovered science  
52 opens a new arena for online monitoring air toxicity and health effects of pollutants.

53

54 **Keywords:** Online Monitoring Toxic Air, Rat, Volatile Organic Compound,  
55 microRNA,

56

## 57 **1. Introduction**

58       Polluted air is a complex mixture of various pollutants, including particulate  
59 matter (PM), biologicals, and also gaseous substances such as O<sub>3</sub> and NO<sub>x</sub>. Inhaling  
60 these pollutants can cause a variety of serious health problems: respiratory and  
61 cardiovascular diseases, and even death.<sup>1-2</sup> For example, PM alone was shown to  
62 have resulted in 4.2 billion deaths in 2015.<sup>2-3</sup> Exhibiting a positive correlation with  
63 daily mean mortality, ground ozone exposure resulted in decreased lung function and  
64 airway inflammation.<sup>4-5</sup> In the meantime, exposure to pathogenic bioaerosols  
65 including bacteria, fungi, virus, et al in the air can cause respiratory infections with  
66 grave human and economic costs.<sup>6-9</sup> Apart from these, there is a growing risk of  
67 terrorist attacks by intentionally releasing biological and chemical agents into the air  
68 to cause substantial civilian casualties.<sup>10-12</sup> Apparently, inhaling unsafe air has  
69 become an increasing health concern. Yet, in many high profile events, in addition to  
70 the public sectors, the air being inhaled is not readily protected or properly guarded.  
71 Real-time monitoring of air toxicity is of great importance, which however is a  
72 long-standing significant challenge in the field.

73

74       For monitoring hazardous substances in the air, a variety of real-time online  
75 monitoring methods have been previously developed or tested for individual  
76 pollutants such as the PM and other chemicals.<sup>13-16</sup> While for bioaerosols, the  
77 adenosine triphosphate (ATP) bioluminescence technology, surface-enhanced Raman  
78 spectroscopy (SERS), bioaerosol mass spectrometry (BAMS), ultraviolet  
79 aerodynamic particle sizer (UVAPS) as well as silicon nanowire (SiNW) biosensor  
80 were investigated and attempted over the years.<sup>17-19</sup> It is well known that these  
81 existing or developed technologies are mostly restricted to either single agent or

82 overall microbial concentration levels without identifying species. In addition,  
83 airborne pollutants and toxicity could vary greatly from one location to another<sup>20-21</sup>,  
84 thus presenting location-specific air toxicity and health effects. Current  
85 epidemiological or toxicological methods involving data analysis or animal and cells  
86 experiments cannot provide in situ air toxicity information, accordingly failing to  
87 represent the response at the time of exposure since biomarker levels evolve over time.  
88 <sup>22</sup> In addition, under certain scenarios (high profile meetings or locations) a rapid  
89 response to air toxicity needs to be in place in order to protect the interests. However,  
90 the response time is very demanding for an immediate effective counter-measure, for  
91 example, usually several minutes can be tolerated.<sup>10, 23</sup> In many air environments,  
92 multiple hazardous pollutants could also co-exist even with unknown ones at a  
93 particular time, which makes protecting the air rather difficult, if not impossible,  
94 using current technologies of species level detection and warning.

95

96 Previously, olfactory receptors of mouse cells for odors<sup>24</sup>, immune B cells<sup>25</sup> for  
97 pathogen detections, and silicon nanowire sensor arrays for explosives<sup>26</sup> were studied.  
98 Recently, a breath-borne biomarker detection system (dLABer) integrating rat's breath  
99 sampling, microfluidics and a silicon nanowire field effect transistor (SiNW FET)  
100 device has been developed for real-time tracking biological molecules in the breath of  
101 rats exposed to particulate matter (PM).<sup>27</sup> The dLABer system was shown to be able  
102 to online detect interleukins-6 (IL-6) level in rat's breath, and capable of  
103 differentiating between different PM toxicities from different cities using the  
104 biomarker level. However, as observed in the study the production of protein  
105 biomarkers could significantly lag behind the pollutant exposure, thus falling short of  
106 providing a timely warning against toxic air. Nonetheless, exhaled breath is

107 increasingly being used in biomarker analysis in both medical and environmental  
108 health studies.<sup>28-30</sup> In addition to protein biomarkers, a large number of volatile  
109 compounds (e.g., nitric oxide, carbon monoxide, hydrocarbons) have been also  
110 studied to assess health status and even developed for clinical diagnosis.<sup>31-32</sup> For  
111 example, ethane and n-pentane detected in the breath were linked to the *in vivo* level  
112 of lipid peroxidation and oxidative stress<sup>33</sup>; breath-borne acetone was shown to  
113 correlate with the metabolic state of diabetic patients.<sup>34</sup> In addition, exhaled VOCs  
114 have been used for the diagnosis of asthma, lung cancer and other diseases.<sup>35-37</sup>  
115 Undoubtedly, breath-borne VOC has emerged as a promising biomarker for health or  
116 environmental exposure monitoring.

117

118 Inspired by the dog sniff for explosive, the work here was conducted to  
119 investigate if we can use breath-borne VOCs from living rats to real-time monitor  
120 toxic air. Particularly, we wanted to investigate: 1) When rats are exposed to air  
121 toxicants, whether the VOC species and concentration in the exhaled breath change?  
122 If yes, how long does the change need to occur? 2) Are there any specific exhaled  
123 VOCs in response to different toxicants exposure including both chemical and  
124 biological agents? 3) To develop an online air toxicity analyzing system via real-time  
125 monitoring of exhaled VOCs of rats. The work here has demonstrated a great promise  
126 for online air toxicity monitoring using the method developed, and opened a new  
127 arena for studying health effects of air pollution.

128

## 129 **2. Materials and methods**

### 130 **2.1 Rat breeding**

131 The Jugular Vascular Catheterizations (JVC) rat model described in our previous

132 study was used in this work.<sup>38</sup> Weighing 200–240 g at an age of 10 weeks, a total of  
133 20 male Wistar rats with jugular vein catheterization operation and a 100 mL/min  
134 inhalation rate were purchased from a local provider (Beijing Vital River Laboratory  
135 Animal Technology Co., Ltd.). With about 1 centimeter out of the skin, a flexible  
136 sterile catheter was embedded into the jugular vein and fixed on the back with staples.  
137 Under a 12 h light/12 h dark cycle, all the rats were raised in an animal care facility  
138 naturally with a normal chow diet. After 1 week of acclimation, the rats were  
139 randomly divided into 5 groups (4 rats in each group) for the exposure of different air  
140 toxicants. All animal experiments were approved by the Institutional Review Board of  
141 Peking University and relevant experiments were performed in accordance with the  
142 ethical standards (approval # LA2019294).

143

## 144 ***2.2 Preparation of toxic air***

145 In this work, four different exposure toxicants (ricin, endotoxin, ozone and  
146 carbon dioxide) and indoor air (as a background control) (5 groups) for rats were  
147 prepared for the exposure experiments. Ricin was extracted from the seeds of castor  
148 produced in Xinjiang, China, and prepared by Institute of Microbiology and  
149 Epidemiology, Academy of Military Medical Sciences in Beijing. The endotoxin was  
150 purchased from Associates of Cape Cod, Inc., USA. The ricin and endotoxin  
151 suspensions were prepared by vigorously vortexing 40 µg of ricin or 50 ng endotoxin  
152 per ml deionized (DI) water for 20 min at a vortex rate of 3200 rpm (Vortex Genie-2,  
153 Scientific Industries Co., Ltd., USA). Detailed information about ricin preparation and  
154 exposure can be also found in another work.<sup>39</sup> Here, ozone was generated by an ozone  
155 generator (Guangzhou Environmental Protection Electric Co., Ltd., China) using  
156 corona discharge method. The ozone was further diluted with indoor air for rat

157 exposure experiments, and the ozone concentration in the exposed chamber was  
158 approximately 5 ppm. Carbon dioxide was purchased from Beijing Haike Yuanchang  
159 Utility Gas Co., Ltd., and diluted 20 times with indoor air to a concentration of about  
160 5% ( $5 \times 10^4$  ppm). The major objective of this work was to study whether there will be  
161 specific VOC release by rats when challenged with different toxicants, not specific  
162 dose-response for each toxicant. Nonetheless, the selection of specific exposure levels  
163 for different toxicants was provided and discussed in Supporting Information.

164

### 165 ***2.3 Rats sniff off toxic air ( $RST_{air}$ ) system and experimental procedure***

166 To investigate whether we can use breath-borne VOCs from living systems to  
167 real-time monitor toxic air, we have developed the system named as *RSTair* (Rats  
168 Sniff Off Toxic Air). As shown in Figure 1 and Figure S1 (Supporting Information),  
169 the system is composed of four major parts: toxicant generator, exposure chamber,  
170 exhaled breath sampling and online VOC analysis. Indoor air was used as carrier gas  
171 for generating toxicant aerosols (ricin and endotoxin) using a Collison Nebulizer (BGI,  
172 Inc., USA) or diluting toxicants gas (ozone and carbon dioxide). The toxicant aerosol  
173 or toxicant gas was introduced together with indoor air into the exposure chamber at a  
174 flow rate of 1 L/min. As shown in Figure S1, a cage was used as the exposure  
175 chamber which can allow rat's feces and urine to fall from below quickly so as to  
176 reduce their influences on VOC analysis. In addition, teflon tubes and vales were also  
177 applied to reducing adsorption loss of VOCs. For ricin and endotoxin, they are small  
178 molecules and relevant particle loss on the aerosolization tubing could be negligible.  
179 When performing the experiments, the rats were first placed in the exposure chamber.  
180 Indoor air was continuously introduced into the chamber at a flow rate of 1 L/min for  
181 10 minutes, then followed by each of tested toxicants together with indoor air at the



182 same flow rate for about 10 minutes to conduct exposure tests.

183

184 For each toxicant experiment, the TVOC was first measured for the control (rat  
185 with indoor air at a flow rate of 1 L/min), then followed by the toxicant aerosol/gas  
186 exposure (rat + toxic air) at the same flow rate for 10 min. Here, the photoionization  
187 detector (PID) (MOCON, Inc., USA) coupled with an air pump was used to real-time  
188 monitor TVOC at a flow rate of 0.6 L/min. After the exposure, the TVOC was  
189 continuously measured again using the PID sensor, reaching a relatively stable level  
190 approximately within 7-8 min. In the meantime, VOC samples were also collected  
191 both before (control) and after the toxicant exposure. A 3.2 L Silonite canister (Entech  
192 Instruments, Inc., USA) was used to collect VOC samples at the flow rate of 0.8  
193 L/min at least 10 min after the exposure test, and the VOCs species were further  
194 analyzed using a gas chromatograph-mass spectrometry/flame ionization detection  
195 (GC-MS/FID) system (Agilent Technologies, Inc., USA). A total of 117 VOC species  
196 were screened and quantified for all exposure tests using the GC-MS system. During  
197 the VOC sample collection, the PID sensor was switched to measure the indoor air  
198 TVOC levels. The detailed descriptions of the working principles of PID and VOC  
199 species analysis by GC-MS/FID are provided in Supporting Information. In this work,  
200 both TVOC and VOC species in the exposure chamber were analyzed for all the  
201 experiments: 1) when the rats were not in the chamber (background air); 2) rats in the  
202 chamber (before toxicant exposure) and rats in the chamber (after toxicant exposure).  
203 The air flows in and out of the exposure chamber were the same both for TVOC  
204 measurements and VOC collection. Based on the dimensions of the exposure chamber,  
205 the residence time of pollutants in the chamber was about 5 min under the  
206 experimental conditions, e.g., the air flow rate was about 1 L/min. We collected VOC

207 samples at least 10 min after the toxicant exposure, therefore remaining secondary  
208 pollutants produced, if any, during the exposure tests such as O<sub>3</sub> will be flushed out by  
209 the indoor air. For each toxicant, the above experiments were repeated four times with  
210 a different rat each time. Each rat (total four) either for toxicant or control exposure  
211 group experienced the exposure only once, not repeated exposures. For each of four  
212 tested toxicants, the same experiments were repeated. All tests were performed inside  
213 a Class 2 Type A2 Biological Safety Cabinet (NuAire, Plymouth, MN), and all  
214 exposure toxicants were ventilated out via the built-in and lab ventilation system.

215  
216  
217  
218

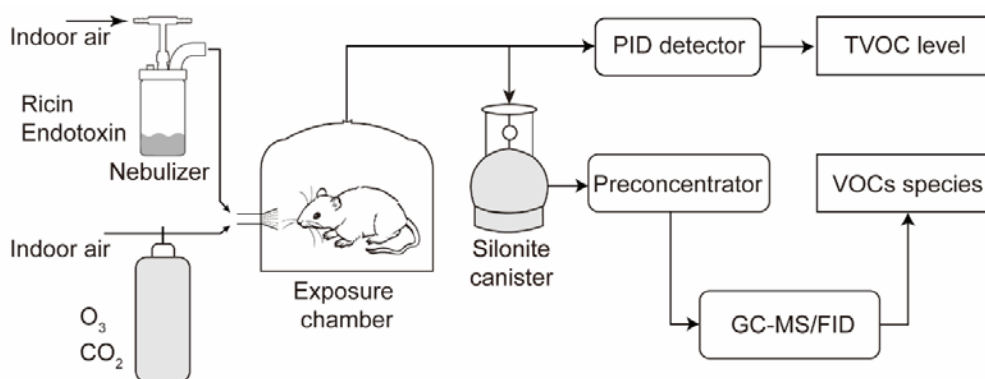

219

220 **Figure 1.** Rats sniff off toxic air (*RSTair*) system: different toxicants were introduced  
221 or aerosolized into the chamber for exposure. The VOCs from the rat placed in the  
222 chamber before and after the toxicant exposure for 10 min were analyzed by the PID  
223 directly and also by GC-MS/FID method coupled with a VOC sampler silonite  
224 canister. During the VOC collection and measurements by the PID, the toxicant  
225 exposure was terminated. Each time only one rat was placed into the chamber. For  
226 each toxicant, the experiment was independently repeated four times with a different

227 rat each time.

228

229

#### 230 **2.4 Blood microRNA detection**

231 Right before and 20 min after each 10-min toxicant exposure, 0.75 mL blood  
232 samples from rats were taken through the catheter using sterile syringes with 23G  
233 flat-end needles and kept at -20 °C for microRNA analysis. The blood microRNAs in  
234 the blood samples such as miR-125b, miR-155, miR-146a, miR-21, miR-20b,  
235 miR-210, miR-122, and miR-33 were analyzed using a RT-qPCR array (Wcgene  
236 Biotech, Inc., China). Total RNAs in the blood samples, including microRNAs, were  
237 extracted using a Trizol reagent (Sigma Aldrich, Inc., USA) according to the  
238 manufacturer's instructions. Subsequently, the purified RNAs were polyadenylated  
239 through a poly(A) polymerase reaction and was then reversed-transcribed into  
240 complementary DNA (cDNA). TIANGEN® miRcute Plus miRNA First-Strand cDNA  
241 Kit (Code No. KR211) was used in the reverse transcriptional reaction system of total  
242 10 μL, including 5 μL 2x miRNA RT Reaction Buffer, 1 μL miRNA RT Enzyme  
243 Mix and 4 μL RNA sample. The reaction conditions are 40 °C for 60 mins and 95 °C  
244 for 3 mins. The cDNA was quantified in real-time SYBR Green RT-qPCR reactions  
245 with the specific microRNA qPCR Assay Primers. TIANGEN® miRcute Plus miRNA  
246 qPCR Kit (SYBR Green) (Code No. FP411) was used in the qPCR reaction system of  
247 total 10 μL, including 5 μL 2x miRcute Plus miRNA PreMix (SYBR&ROX),  
248 0.2 μL Forward Primer, 0.2 μL Reverse Primer, 1 μL 50X ROX Reference Dye,  
249 1 μL DNA Sample and 2.6 μL ddH<sub>2</sub>O. The cycling conditions were 95 °C for 15  
250 min, followed by 40 cycles at 94 °C for 20s, 60 °C for 15s and 72°C for 30s. The  
251 primers used for qPCR are presented in Table S1 (Supporting Information).

252

### 253 **3. Statistical analysis**

254 In this study, the TVOC levels for all samples detected by the PID sensor were  
255 not normally distributed, while their TVOC change rates were. The TVOC change  
256 rate was calculated by dividing the TVOC level after exposure using the TVOC level  
257 before exposure. Therefore, the Mann-Whitney rank sum test was used to analyze the  
258 differences in TVOC levels before and after each toxicant exposure, and t-test was  
259 used to analyze the differences in TVOC change rates between each toxicant exposure  
260 group and the control group (indoor air). For individual VOC concentrations by  
261 GC-MS/FID, the paired t-test was used to analyze differences for each VOC species  
262 before and after the exposure. The software Canoco 4.5 was used to visualize the  
263 VOC profile distance and relatedness between the samples of different groups using  
264 the principal component analysis (PCA). Besides, the concentrations of micro-RNAs  
265 in blood samples from different rat groups were determined by RT-qPCR. For the  
266 group exposed to carbon dioxide, blood samples were only taken from two rats  
267 (before and after the 10-min exposure) because of the catheter blockage (unable to  
268 draw bloods) for the other two. For the other three groups, blood samples were  
269 obtained for all four rats. The differences between micro-RNA levels in blood samples  
270 before and after the exposure in one group were analyzed using a paired t-test (data  
271 exhibited a normal distribution) or Wilcoxon signed rank test (data did not follow a  
272 normal distribution). The outliers for normally distributed data were examined and  
273 eliminated by a Grubbs test. All the statistical tests were performed via the statistical  
274 component of SigmaPlot 12.5 (Systat Software, Inc., USA), and a *p-value* of less than  
275 0.05 indicated a statistically significant difference at a confidence level of 95%.

276

277

## 278 **4. Results and discussion**

### 279 ***4.1 TVOC monitoring for the toxicants exposure***

280 As described in the experimental section, four toxicants (ricin, endotoxin, ozone  
281 and carbon dioxide) and indoor air (as a background control) were used for inhalation  
282 exposure in rats. For each group, the TVOC levels of only 3 rats (PID  
283 instrument/software failure for one out of 4 rats) were shown in Figure 2. The indoor  
284 air background TVOC was found to be less than  $0.04 \pm 0.02$  ppm. After one rat was  
285 placed in the exposure chamber, the TVOC level in the cage was shown to first  
286 gradually increase, then reach a relatively stable level after about 500 seconds. The  
287 TVOC level before the exposure (rat + indoor air) when one rat was in the chamber  
288 was about 2 ppm, except for the CO<sub>2</sub> group it was about 0.5-0.8 ppm (These  
289 differences, if any, applied to both before and after exposure in one test, thus  
290 presenting no influences on the same experiments). The differences in TVOC levels  
291 for indoor air exposures (different times: “before” and “after”, but the same indoor air)  
292 were small (the average change rate was about  $-4\% \pm 1.4\%$  (95% confidence interval)),  
293 although the Mann-Whitney Rank Sum Test showed that for each of the rats, the  
294 difference (over some time for the indoor air) was significant ( $p$ -value $<0.001$ ). The  
295 background indoor air TVOC levels were 1.22-5.1% (detected) of the chamber TVOC  
296 with rats together with indoor air or other toxicants). The fluctuations were taken into  
297 account for each toxicant exposure test. Nonetheless, the fluctuations, if any, from  
298 background indoor air had minor impacts on the TVOC levels measured for rats’  
299 exposure tests. The change rates (n=3) of the control group (indoor air) then served as  
300 the reference for other toxicant exposures in the statistical analysis. During the indoor  
301 air experiment, the rats were seen to carry out normal life activities in the exposure

302 chamber, and correspondingly the TVOCs in the chamber were shown to remain  
303 relatively stable.

304

305

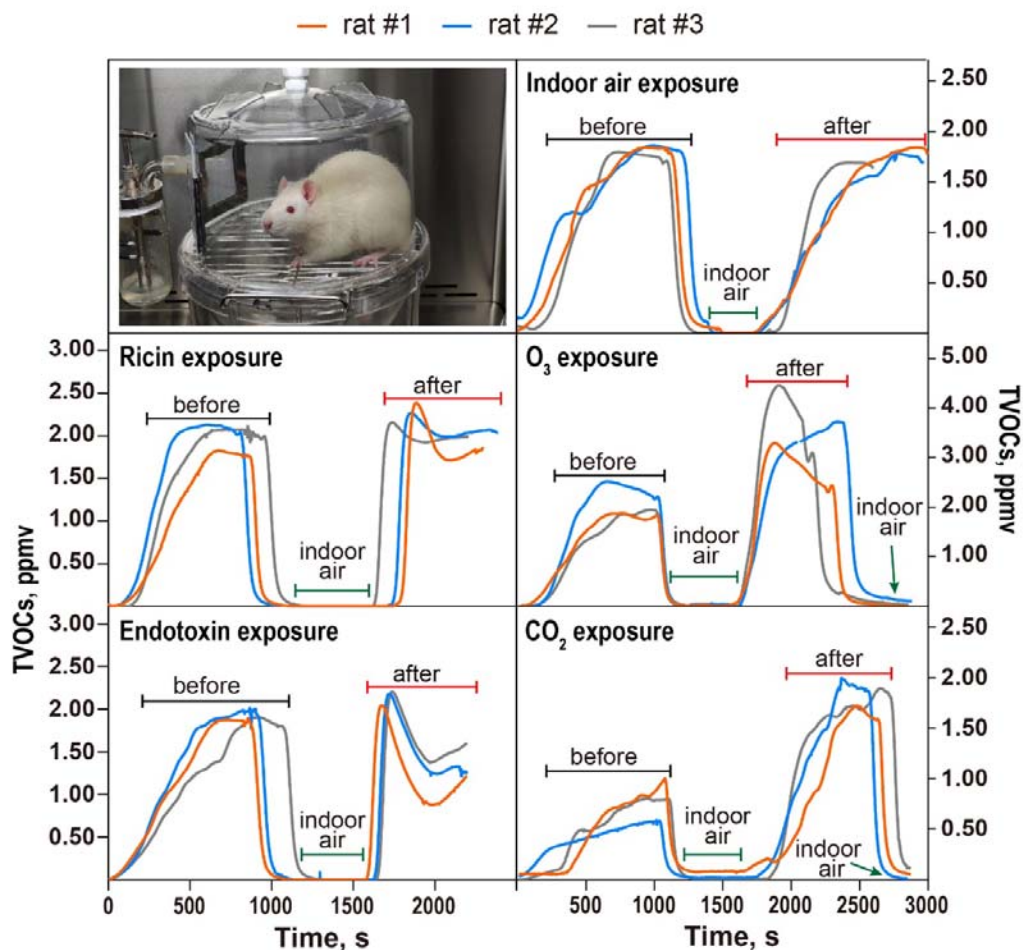

306

307 **Figure 2.** Real-time continuous measurements of exhaled TVOC levels in the  
308 chamber when rats were exposed to different toxicants via inhalation for 10 mins:  
309 Indoor air, ricin, endotoxin, O<sub>3</sub> and CO<sub>2</sub>. During the exposure processes, the PID  
310 sensor was turned off. Data lines (measurement time was 1000 s) represent results  
311 from three individual rats (#1, #2, #3) before or after exposure to each of the air  
312 toxicants (aerosolized amounts described in the experimental section) tested. Each

313 exposure test was independently repeated with four rats from the same group (PID  
314 instrument/software failure for one rat).

315

316

317 In contrast, the TVOC levels were shown to vary greatly with different toxicant  
318 exposures as shown in Figure 2. For example, when rats were exposed to the  
319 aerosolized ricin, the TVOC level was observed to exhibit an average change rate of  
320  $-3\% \pm 1.6$ . Compared to the control group (indoor air + rat before the exposure) shown  
321 in Figure 2, the difference of the TVOC change rate was not significant for the ricin  
322 exposure (t-test,  $p$ -value=0.426). For ricin exposure, its concentration (40  $\mu\text{g}/\text{mL}$   
323 suspension aerosolized) might be too low in aerosol state after the aerosolization from  
324 the liquid to produce a detectable response from the rats. It was previously reported  
325 that 0.1 mg/mL ricin solution was used for aerosolization and subsequent exposure to  
326 mice (Ref # 5, Supporting Information). After 30 minutes ricin aerosol exposure, the  
327 exposed mice became poisoned. The concentration of ricin used in this experiment  
328 was lower and the exposure time was shorter, therefore the toxicity reaction may be  
329 mild. In contrast to the ricin exposure, however we observed a different phenomenon  
330 for the endotoxin (50 ng/mL aerosolized) tests as shown in Figure 2. Upon the  
331 endotoxin exposure, the TVOC level was observed to first increase, and then  
332 decreased to a level that was about 21-46% below the pre-exposure level after four  
333 minutes (Mann-Whitney Rank Sum Test, all  $p$ -values<0.001). Compared to the  
334 control group (indoor air + rat), the difference of the TVOC change rate was  
335 statistically significant for endotoxin (t-test,  $p$ -value=0.0147). The observed  
336 differences from the ricin and endotoxin exposures could be due to different  
337 mechanisms initiated by different substances involved. Ricin is derived from plant,

338 while endotoxin is from Gram-negative bacterial membrane. They could interact  
339 differently with relevant human respiratory or other body cells. Nonetheless, for both  
340 ricin and endotoxin, they were probably causing health effects by immuno-toxicity,  
341 while O<sub>3</sub> and CO<sub>2</sub> both induce harm first by chemical manners.

342

343 After exposure to gaseous toxicants such as ozone and carbon dioxide, the levels  
344 of TVOCs in the exposure chamber with rats were observed to have increased  
345 significantly, as observed in Figure 2. As can be seen from the figure, the TVOC  
346 levels has increased for about 44-110% for ozone and about 109-265% for carbon  
347 dioxide exposure (Mann-Whitney Rank Sum Test, all *p-values*<0.001). The t-test  
348 showed that differences of the TVOC change rates of both ozone and CO<sub>2</sub> exposures  
349 compared to the control group (indoor air) were statistically significant  
350 (*p-value*=0.0219 and 0.0296, respectively). These data indicated that rat exposure to  
351 both ozone and CO<sub>2</sub> has resulted in significant elevations of TVOCs, suggesting rats  
352 were actively responding to the exposure challenges. The behavior observation from a  
353 video also indicated that rats after the exposure to O<sub>3</sub> seemed to be suffering from the  
354 challenge (Video S1, Supporting Information).

355

#### 356 ***4.2 Changes in exhaled VOCs after exposure to different toxicants***

357 Using GC-MS/FID method, a total of 31 different VOCs out of 117 screened  
358 were detected and shown in Figure S2 (Supporting Information) for background  
359 indoor air with and without rats. Among detected VOCs as shown in Figure S2  
360 (Supporting Information), the VOCs with the highest concentrations in indoor air  
361 were n-hexane, ethyl acetate and acetone. When rats were placed in the exposure  
362 chamber (one rat at each time), the most abundant VOC species was detected to be



363 acetone, which was about 4 times more than that of the indoor air background.  
 364 Statistical tests found that the concentrations of ethylene and ethane in the chamber  
 365 containing one rat were significantly lower than those of the background (paired t-test,  
 366  $p$ -value<0.05), which in part could be due to the air dilution by the rat's breath.  
 367 Namely, when rats' breath with specific higher or lower VOC species replaced  
 368 equivalent indoor air inside the chamber, diluting effects for higher indoor VOC  
 369 species and enhancing effects for lower indoor VOC species could take place.

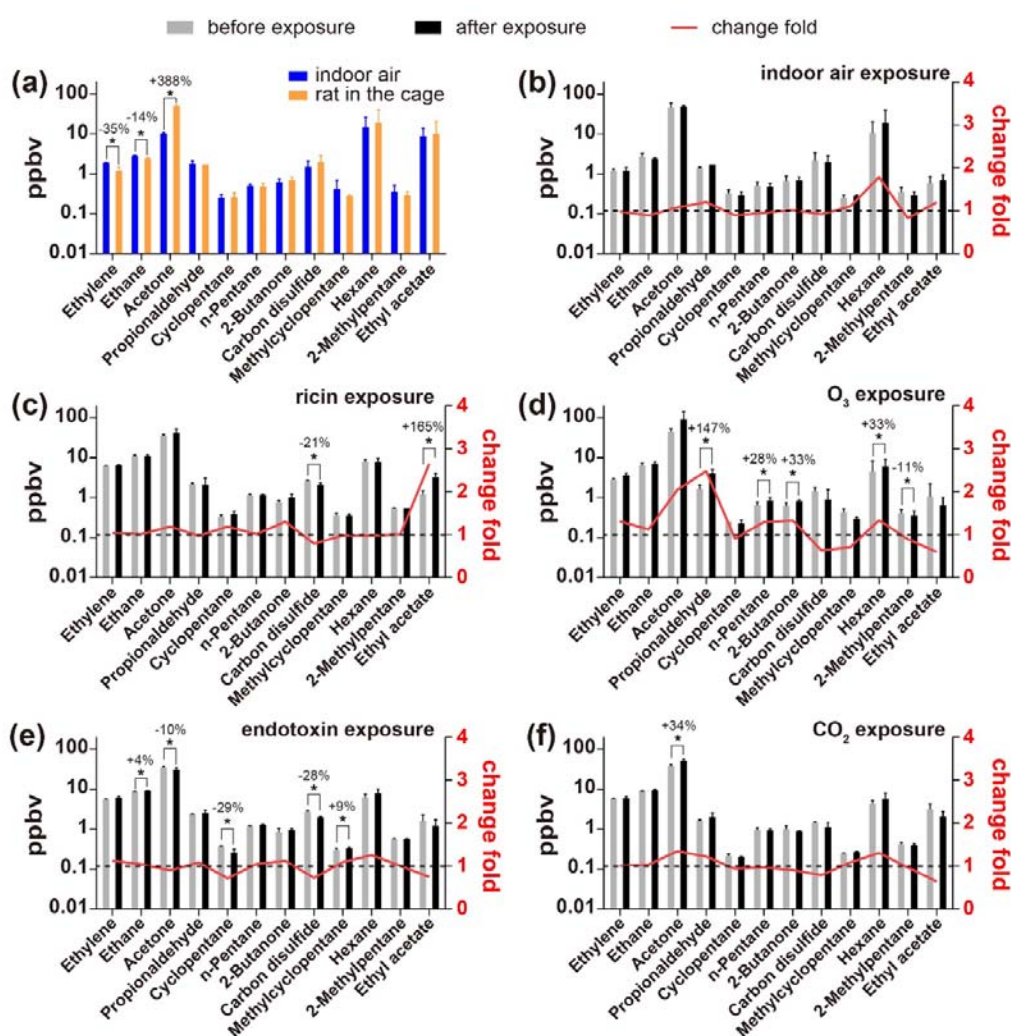

370

371 **Figure 3.** Differentiations of VOC species from indoor air and those from the rats'  
 372 exhaled breath under different air toxicity with exposure to ricin, O<sub>3</sub>, endotoxin and

373 CO<sub>2</sub>. The red lines show that the average change ratios of every toxicant calculated by  
374 the level after the exposure divided by the level before exposure (right axis). The  
375 dotted line is the baseline with a change ratio of 1. Percentages refer to specific VOC  
376 percentage change before and after the exposure. Values represent averages and  
377 standard deviations from three different rats. “\*” indicates a significant difference at  
378  $p\text{-value}<0.05$ .

379

380 Differentiations of VOC species from the rat’s exhaled breath under different  
381 toxicants exposures were also shown in Figure 3. There were no significant  
382 differences in the concentrations of any VOCs before and after the exposure for the  
383 control group, i.e., indoor air (t-test,  $p\text{-value}=0.05$ ). This suggests that indoor air is  
384 relatively less toxic at a level that is unable to detect a VOC change. In contrast,  
385 specific VOC species had experienced significant changes when rats were exposed to  
386 ricin, endotoxin, O<sub>3</sub> and CO<sub>2</sub> as observed from Figure 3. For example, exposure to  
387 ricin caused significant higher concentration of ethyl acetate (183% higher), while  
388 lower concentration of carbon disulfide (22% lower). As shown in Figure 3, after the  
389 endotoxin exposure process, concentrations of five VOC species: ethane, acetone,  
390 cyclopentane, carbon disulfide and methylcyclopentane were shown to be  
391 significantly different with those of before the exposure (t-test, all  $p\text{-values}<0.05$ ). As  
392 can be seen from the results of the ozone exposure group in Figure 3, the  
393 concentrations of propionaldehyde, pentane, 2-butanone, hexane and 2-methylpentane  
394 exhibited significant differences before and after exposure (t-test, all  $p\text{-values}<0.05$ ),  
395 in which all the VOCs except 2-methylpentane were elevated. In comparison, rat  
396 exposure to CO<sub>2</sub> resulted in acetone level increase by 34% (t-test,  $p\text{-value}=0.0016$ ).  
397 These data suggest that exposure to different toxicants had led to production of

398 different profiles of VOC species in addition to their level changes.

399

#### 400 ***4.3 Detection of micro RNAs in Blood Samples***

401 To further explore the VOC response mechanism of rats to toxicants exposure,  
402 microRNAs (miRNA) in the blood samples were examined by an RT-qPCR assay.  
403 Fold-changes in microRNA levels after toxicants exposure were shown in Table S2  
404 (Supporting Information). The level of miR-33 in the blood of rats was shown to be  
405 significantly lower than that before ricin exposure ( $p\text{-value}<0.05$ ); after exposure to  
406 ozone, miR-146a level in the blood samples of rats was significantly higher than those  
407 before the exposure ( $p\text{-value}<0.05$ ), while miR-155 was significantly lower than that  
408 before the exposure ( $p\text{-value}<0.05$ ). For other microRNAs as listed in Table S2, the  
409 changes seemed to be insignificant (t-test,  $p\text{-values}>0.05$ ).

410

411 As observed from Figure 4, PCA results revealed a clear contrast in breath-borne  
412 VOC profiles of rats between different toxicants exposures. The VOC profiles of the  
413 ozone exposure group was very different from that of the control group (indoor air)  
414 and the VOCs profile of the ricin exposure group was the closest to that of the control  
415 group, which agreed with TVOC level and VOC species profiles obtained above.  
416 Overall, the experiments showed that rats responded differently to different toxicants  
417 by releasing different VOC species owing to different mechanisms of toxicity: ozone  
418 caused significant increases in various breath-borne VOCs; while endotoxin exposure  
419 generally decreased the releasing of VOCs; and ricin and carbon dioxide exposure  
420 resulted in one or two significant VOC species changes. In general, the results of  
421 qualitative and quantitative analysis by the GC-MS/FID method agreed with the  
422 TVOC level monitored by the PID sensor.

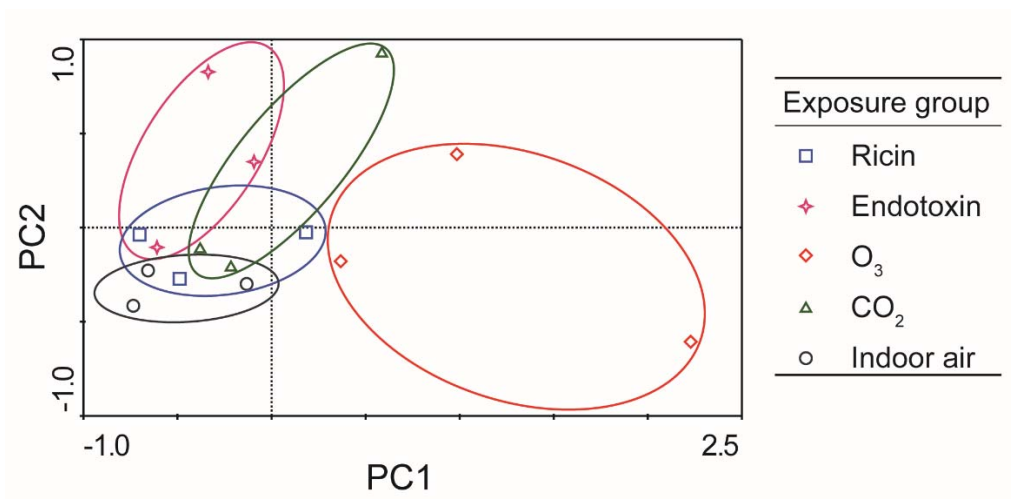

423

424 **Figure 4.** PCA ordinations of exhaled breath-borne VOCs profiles under exposures to  
425 different toxicants: ricin, endotoxin, O<sub>3</sub>, CO<sub>2</sub> and control (indoor air). PC1 and PC2  
426 are the first and second principal components. The VOCs species involved in the PCA  
427 analysis were the 12 species which were shown to have undergone changes after each  
428 toxicant exposure. Data presented in the figure were from three independent rats  
429 exposed to each toxicant.

430

431 As observed from Figure 3, exposure to ricin caused 183±143 % higher  
432 concentration of ethyl acetate, while 22±8 % lower concentration of carbon disulfide.  
433 It was previously reported the concentration of ethyl acetate was significantly higher  
434 in exhaled breath from people with cancer compared to the healthy group.<sup>40,41</sup> In  
435 addition, *in vitro* experiments have shown the human umbilical vein endothelial cells  
436 (HUVEC) can produce ethyl acetate, which is presumably generated by a reaction of  
437 ethanol with acetic acid.<sup>42</sup> It was demonstrated that ricin is not only responsible for  
438 the ricin intoxication through ribosomal inactivation and subsequent inhibition of  
439 protein synthesis and cell death, but also shows endothelial toxicity by acting as a  
440 natural disintegrin binding to and damaging human endothelial cells.<sup>43</sup> Therefore, the

441 toxicity of ricin on the endothelial cells might be the source of the higher  
442 concentration of ethyl acetate observed in this work. As a disease biomarker, carbon  
443 disulfide was observed in the exhaled breath.<sup>44-45</sup> Recently, it was suggested that the  
444 carbon disulfide may be generated endogenously and play a role as a bioregulator.<sup>46</sup>  
445 Here, we observed that exposure to both ricin and endotoxin resulted in lower levels  
446 of breath-borne carbon disulfide compared to the control.

447

448 For CO<sub>2</sub> and endotoxin exposure, the observation for acetone was the opposite as  
449 shown in Figure 3. Acetone in exhaled breath was widely investigated in many studies  
450 as an important biomarker related to blood glucose and diabetes.<sup>34,47</sup> Acetone is  
451 produced in the fatty acids metabolism by hepatocytes via decarboxylation of excess  
452 acetyl coenzyme A (Acetyl-CoA), and then oxidized via the Krebs cycle in peripheral  
453 tissue.<sup>48</sup> As shown in Figure 3, the acetone level increased by 34±9% as a result of  
454 CO<sub>2</sub> exposure, suggesting CO<sub>2</sub> caused hypoxia in rats, and led to increased respiration  
455 from rats. These increases in acetone level corresponded to TVOC level increase as  
456 determined by the PID sensor after the exposure to CO<sub>2</sub>. However, when exposed to  
457 endotoxin, the acetone level in the exposure chamber decreased by about 10±6%,  
458 indicating that the respiration of the rats may be attenuated by the exposure of  
459 endotoxin. Clearly, the involved mechanisms by which endotoxin and CO<sub>2</sub> cause  
460 health effects to rats could be very different.

461

462 As observed in Figure 3, the increase of ethane level by endotoxin exposure  
463 suggested that lipid damage was induced by oxidative stress in the rat's body since  
464 ethane is acknowledged as a marker of lipid peroxidation and described to be  
465 generated by peroxidation of ω-3 polyunsaturated fatty acids.<sup>33</sup> In addition to ethane,

466 the increase of methylcyclopentane level as shown in Figure 3 might also be the result  
467 of the endotoxin exposure. Endotoxin has been shown to trigger inflammation through  
468 its interaction with the TLR4/CD14/MD2 receptor and then initiates a signal cascade.  
469 This reaction correspondingly results in the activation of transcription factor such as  
470 NF- $\kappa$ B leading to the production of pro-inflammatory cytokines and type 1 interferons  
471 (IFNs), and finally results in systemic inflammatory response syndrome.<sup>49</sup> In general,  
472 in terms with the average fold changes, the concentration of total VOCs in the exhaled  
473 breath was relatively lower after the endotoxin exposure, which agreed with the  
474 results of TVOC obtained by the PID sensors.

475

476 In addition to these biologicals, we have also shown that exposure to chemicals  
477 such as ozone and CO<sub>2</sub> also resulted in in-vivo changes in VOC levels. From the fold  
478 changes of various VOC species such as propionaldehyde, N-pentane, 2-Butanone,  
479 and Hexane, the ozone exposure has resulted in an overall increase of VOCs in rats'  
480 exhaled breath, which agreed with the TOVC monitoring shown in Figure 2 by the  
481 PID sensors. It was previously indicated that increase in propionaldehydes, further  
482 products of lipid peroxidation, indicated more severe oxidative damage in rats  
483 following exposure to ozone.<sup>50</sup> Here, we also showed that after exposure to ozone  
484 changes in specific breath-borne VOCs and also certain miRNA regulations were  
485 detected. Ozone was described as a strong oxidizing agent, and can cause intracellular  
486 oxidative stress through ozonide and hydroperoxide formation.<sup>51</sup> The mechanism of  
487 ozone oxidative damage involves the activation of Nrf2, heat shock protein 70, and  
488 NF- $\kappa$ B, thus increasing expression of a range of proinflammatory cytokines such as  
489 TNF $\alpha$  and interleukin 1 $\beta$ , and chemokines such as interleukin 8.<sup>52</sup> The results above  
490 show that regardless of toxicant types breath-borne VOCs from rats experienced *in*

491 *vivo* changes.

492

493 Results of miRNAs from rats' blood as shown in Table S4 revealed different  
494 mechanisms by rats when exposed to various types of toxicants. miRNAs are short  
495 non-coding RNA sequences that regulate gene expression at the posttranscriptional  
496 level; and many miRNAs have already been identified to influence physiological  
497 processes such as immune reaction, adaptation to stress, and widely investigated in  
498 environmental exposure studies.<sup>53</sup> Among these microRNAs, miR-125b, miR-155,  
499 miR-146a, and miR-21 are mainly shown to regulate oxidative stress and  
500 inflammatory processes *in vivo*, and widely investigated in air pollution related  
501 studies.<sup>53-54</sup> For example, among them, miR-155 has a positive regulation function,  
502 and the other three are negative regulation.<sup>55-56</sup> However, in this study, the ozone  
503 exposure resulted in decreased levels of miR-155 (t-test, *p-value*<0.05), which are  
504 different from previous reports in the literature.<sup>55</sup> The difference could be due to  
505 different exposure toxicant, i.e., ozone used here, leading to acute lung damages  
506 compared to mild airway inflammation or asthma problems in other studies. Previous  
507 studies have shown that miR-20b and miR-210 are hypoxia regulators in animals, and  
508 miR-122 and miR-33 are mainly responsible for regulating lipid metabolism and  
509 glucose metabolism in the body.<sup>57-58</sup> However, these microRNAs, except for the  
510 decreased level of miR-33 and increased level of miR-146a caused by ricin and ozone  
511 exposure, respectively, were shown to have not undergone significant changes in this  
512 study after the exposures to four different toxicants (*p-values*=0.05). The possible  
513 reason may be that microRNAs act as post-transcriptional regulators by degrading  
514 mRNA or inhibiting their translation, thus failing to respond in a timely manner  
515 during short-term exposure (blood samples taken 20 min after the 10-min exposure ).

516 To further understand the problem, a yeast model is currently being used to fully  
517 investigate the mechanisms underlying the miRNA regulation when exposed to the  
518 toxicants used here. Nonetheless, these results here reflected that exposure to the  
519 toxicants led to specific miRNAs either up- or down-regulated. On the other hand, the  
520 results here also suggest, especially for those no changes observed for the miRNAs,  
521 higher toxicant level or specific longer time might be needed to allow miRNA  
522 regulation change to occur.

523

524 To address the major objective of this work, we repeated a total of 20 times using  
525 5 different exposure agents such as ozone, CO<sub>2</sub>, ricin, endotoxin together with the  
526 background indoor air as a control, and 20 different rats. Clearly, above results  
527 indicate that when rats are exposed to toxic substances their certain metabolic  
528 activities are immediately affected, i.e., these exposures promoted or inhibited  
529 specific VOC productions. Based on the results we obtained from this work, the  
530 following VOC emission mechanisms of rats when exposed to different toxicants are  
531 proposed and illustrated in Figure 5. Previously, it was suggested that VOCs are  
532 produced during the normal metabolism in the body; while pathological processes,  
533 such as metabolic disorders, can also produce new species of VOCs or alter the levels  
534 of existing VOCs.<sup>59</sup> Therefore, cell or tissue injuries caused by external toxicants  
535 exposure also can alter the exhaled VOCs profile by disturbing the normal process.<sup>60</sup>  
536 The exact toxic effect mechanism as observed from this work could vary from one  
537 toxicant to another. For some pollutants such as endotoxin and ricin, there are specific  
538 receptors to recognize them and then start the chain of responses or reactions.<sup>49,61</sup>  
539 Among these various mechanisms, the ROS (reactive oxygen species) and oxidative  
540 stress are recognized to be the central and the common mechanism in various forms of



541 pathophysiology, as well as the health effect of various air pollutants including  
542 ambient particulate matter (PM).<sup>1, 62-63</sup> Oxidative stress is essentially a compensatory  
543 state of the body and can trigger redox-sensitive pathways leading to different  
544 biological processes such as inflammation and cell death.<sup>51,64</sup> For example, the strong  
545 oxidants such as ozone might cause oxidative stress through direct effects on lipids  
546 and protein<sup>65-66</sup>, which mostly caused the generation and release of hydrocarbons and  
547 aldehydes, such as ethane, ethylene, and propionaldehyde.<sup>50,67</sup> While carbon dioxide  
548 tends to make the redox balance tilted toward the reduction side by reducing oxygen  
549 supply and thus influencing the energy metabolism in cells.<sup>68-70</sup> For ricin and  
550 endotoxin exposure, the underlying mechanisms seem to be different from ozone and  
551 CO<sub>2</sub>, and they could cause oxidative stress indirectly through the activation of  
552 intracellular oxidant pathways. Nonetheless, all toxicants share a common effect of  
553 disrupting the redox balance, and thus interfere with normal biochemical reactions or  
554 cause material damages in cells, accordingly changing the VOC profile released into  
555 the breath. As discussed above, in this work, the VOCs profile of rats changed  
556 significantly after exposure to different toxicants. Therefore, regardless of toxicant  
557 types, breath-borne VOCs from the rats seem to be capable of serving as a proxy for  
558 real-time monitoring air toxicity. It was reported about 100 years ago that three mice  
559 were also carried on all British submarines for sensing small leakage of gasoline as  
560 the rats could squeak to notify the crew (Figure S3, Supporting Information). Some  
561 previously detected VOCs such as hexane, pentane, acetaldehyde, butanone, and  
562 acetone from rat's exhaled breath<sup>71, 72</sup> were also detected in this work. Nonetheless,  
563 due to variations in rat breed, experimental conditions, VOC sampling and analysis  
564 methods, it is rather difficult to exactly compare the VOCs from rat's exhaled breath  
565 across different studies. There might be some breath-borne VOC species not identified

566 yet for the rats used here. Interestingly, rat L6 skeletal muscle cells cultivated with  
567  $\alpha$ -MEM containing 10% FCS were shown to release 7 VOC species and uptake 16  
568 VOC species.<sup>73</sup> Similarly, the increased VOCs detected here from rat's exhaled breath  
569 might be released from lung cells or other impacted ones by the exposure. On another  
570 front, previous work showed that changes were also detected in breath-borne VOCS  
571 from people with upper respiratory infections compared to the health individuals (Ref  
572 #7, Supporting Information). All these studies and data support the results and validity  
573 of our work from various aspects. For improving  $RST_{air}$  performance, GC-MS can be  
574 also replaced using the Proton Transfer Reaction-Mass Spectrometry (PTR-MS) for  
575 fast online VOC species analysis. By using this discovered fundamental science, the  
576 invented  $RST_{air}$  system here showed its great promise of revolutionizing the air  
577 toxicity monitoring, and providing significant technological advances for air security  
578 in related fields such as military defense, customs, counter-terrorism and security  
579 assurances for important events or special locations.

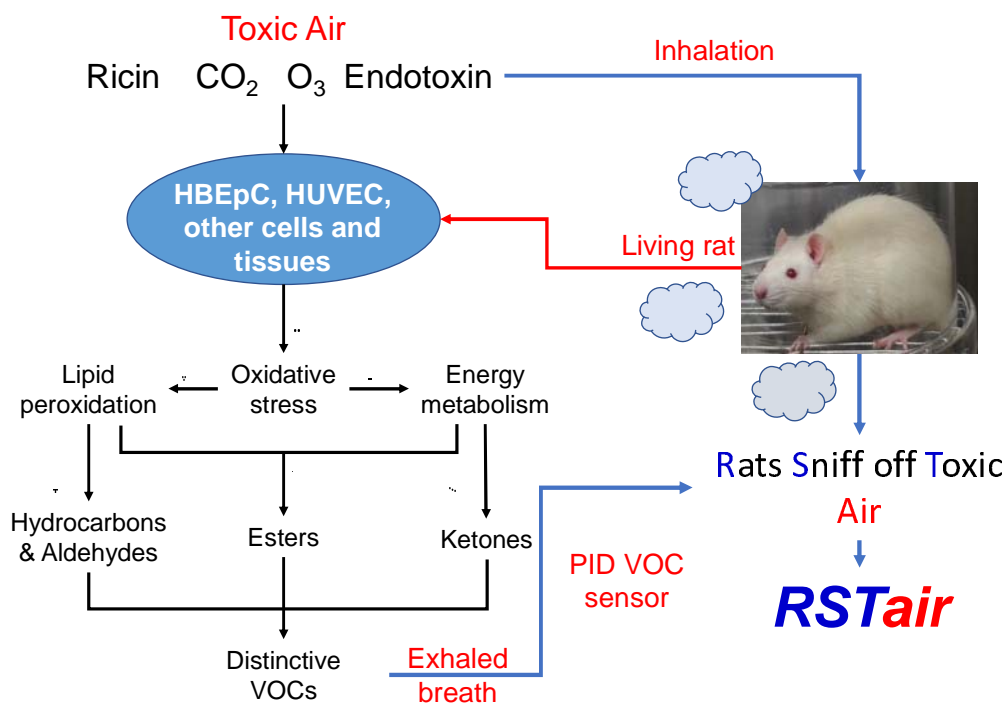

580

581 **Figure 5.** Proposed mechanisms of toxic effects and VOCs releasing in rats when  
 582 exposed to the environmental toxicants via inhalation. The black arrows represent the  
 583 toxic effects of different toxicants and the possible pathways of VOCs generation. The  
 584 blue arrows stand for the principle and working process of the invented *RSTair* system  
 585 for real-time air toxicity monitoring. The corresponding references cited are: ① <sup>59</sup>;

586 ② <sup>66</sup>; ③ <sup>63</sup>; ④ <sup>48</sup>; ⑤ <sup>42</sup>; ⑥ <sup>48, 70</sup>.

587

### 588 Supporting Information

589 Measurements of exhaled VOCs by PID and GC-MS/FID, Selection of exposure  
 590 levels for different toxicant, experimental setup for *RSTair* system, indoor air  
 591 background VOCs, Photo of UK postcard for three mice carried on British  
 592 submarines, Primers used for RT-qPCR analysis of microRNA and mi-RNA  
 593 expression level changes after exposure, video of rat after exposed to ozone were

594 provided as Supporting Information.

595

596 **Acknowledgements**

597 This study was supported by the NSFC Distinguished Young Scholars Fund  
598 Awarded to M. Yao (21725701), and the Ministry of Science and Technology  
599 (2016YFC0207102).

600

601 **Conflict of interests**

602 The authors declare no competing financial interest.

603

604 **References**

- 605 1. Brook, R. D.; Rajagopalan, S.; Pope, C. A., III.; Brook, J. R.; Bhatnagar, A.;
- 606 Diez-Roux, A., V.; Holguin, F.; Hong Y.; Luepker, R., V.; Mittleman, M. A.; Peters, A.;
- 607 Siscovick, D.; Smith, S. C., Jr.; Whitsel, L.; Kaufman, J. D. , Particulate matter air
- 608 pollution and cardiovascular disease an update to the scientific statement from the
- 609 American Heart Association. *Circulation* **2010**, *121* (21), 2331-2378.
- 610 2. Cohen, A. J.; Brauer, M.; Burnett, R.; Anderson, H. R.; Frostad, J.; Estep, K.;
- 611 Balakrishnan, K.; Brunekreef, B.; Dandona, L. Dandona, R.; Feigin, V.; Freedman, G.;
- 612 Hubbell, B.; Jobling, A.; Kan, H.; Knibbs, L.; Liu, Y.; Martin, R.; Morawska, L.; C
- 613 Pope, C. A., III.; Shin, H.; Straif, K.; Shaddick, G.; Thomas, M.; Dingenen, R. v.;
- 614 Donkelaar, A. v.; Vos, T.; Murray, C. J. L.; Forouzanfar, M. H. Estimates and
- 615 25-year trends of the global burden of disease attributable to ambient air pollution: an
- 616 analysis of data from the Global Burden of Diseases Study 2015. *Lancet* **2017**, *389*
- 617 (10082), 1907.
- 618 3. GBD 2015 Risk Factors Collaborators. Global, regional, and national
- 619 comparative risk assessment of 79 behavioural, environmental and occupational, and
- 620 metabolic risks or clusters of risks, 1990-2015: a systematic analysis for the Global
- 621 Burden of Disease Study 2015. *Lancet* **2016**, *388* (10053), 1659-1724.
- 622 4. EPA, U. S., Integrated Science Assessment (ISA) of Ozone and Related
- 623 Photochemical Oxidants (Final Report, Feb 2013). Agency, U. S. E. P., Ed.
- 624 Washington, DC, 2013; Vol. EPA/600/R-10/076F.
- 625 5. Jerrett, M.; Burnett, R. T.; Pope, C. A. III.; Ito, K.; Thurston, G.; Krewski, D.;
- 626 Shi, Y.; Calle, E.; Thun, M. Long-term ozone exposure and mortality. *N. Engl. J. Med.*
- 627 **2009**, *360* (11), 1085-1095.
- 628 6. Thompson, W. W.; Shay, D. K.; Weintraub, E.; Brammer, L.; Cox, N.; Anderson,

- 629 L. J.; Fukuda, K. Mortality associated with influenza and respiratory syncytial virus in  
630 the United States. *JAMA* **2003**, 289 (2), 179-186.
- 631 7. Jones, R. M.; Brosseau, L. M. Aerosol transmission of infectious disease. *J.*  
632 *Occup. Environ. Med.* **2015**, 57 (5), 501-508.
- 633 8. Fernstrom, A.; Goldblatt, M. Aerobiology and its role in the transmission of  
634 infectious diseases. *J Pathog* **2013**, Article ID: 493960, doi:  
635 <http://dx.doi.org/10.1155/2013/493960>.
- 636 9. Yu, I. T. S.; Li, Y.; Wong, T. W.; Tam, W.; Chan, A. T.; Lee, J. H.W.; Leung, D. Y.  
637 C.; Ho, T. Evidence of airborne transmission of the Severe Acute Respiratory  
638 Syndrome Virus. *N. Engl. J. Med.* **2004**, 350 (17), 1731-1739.
- 639 10. Green, M. S.; LeDuc, J.; Cohen, D.; Franz, D. R. Confronting the threat of  
640 bioterrorism: realities, challenges, and defensive strategies. *Lancet Infect Dis* **2019**, 19  
641 (1), e2-e13.
- 642 11. Okumura, T.; Takasu, N.; Ishimatsu, S. Miyanoki, S.; Mitsubishi, A.; Kumada. K.;  
643 Tanaka, K.; Hinohara, S. Report on 640 Victims of the Tokyo subway Sarin attack.  
644 *Ann. Emerg. Med.* **1996**, 28 (2), 129-135.
- 645 12. Jernigan, D. B.; Raghunathan, P. L.; Bell, B. P.; Brechner, R.; Bresnitz, E. A.;  
646 Butler, J. C.; Cetron, M.; Cohen, M.; Doyle, T.; Fischer, M.; Greene, C.; Griffith, K.  
647 S.; Guarner, J.; Hadler, J. L.; Hayslett, J. A.; Meyer, R.; Petersen, L. R.; Phillips, M.;  
648 Pinner, R.; Popovic, T.; Quinn, C. P.; Reefhuis, J.; Reissman, D.; Rosenstein, N.;  
649 Schuchat, A.; Shieh, W.; Siegal, L.; Swerdlow, D. L.; Tenover, F. C.; Traeger, M.;  
650 Ward, J. W. Weisfuse, I.; Wiersma, S.; Yeskey, K.; Zaki, S.; Ashford, D. A. Perkins, B.  
651 A. Ostroff, S.; Hughes, J.; Fleming, D.; Koplan, J. P.; Gerberding, J. L. and the  
652 National Anthrax Epidemiologic Investigation Team. Investigation of  
653 bioterrorism-related anthrax, United States, 2001: epidemiologic findings. *Emerg.*

- 654 *Infect. Dis.* **2002**, 8 (10), 1019.
- 655 13. Marć, M.; Tobiszewski, M.; Zabiegała, B.; Guardia, M. d. I.; Namieśnik, J.  
656 Current air quality analytics and monitoring: A review. *Anal. Chim. Acta* **2015**, 853,  
657 116-126.
- 658 14. Sameenoi, Y.; Koehler, K.; Shapiro, J.; Boonsong, K.; Sun, Y.; Collett, J. Jr.;  
659 Volckens, J.; Henry, C. S. Microfluidic electrochemical sensor for on-line monitoring  
660 of aerosol oxidative activity. *J. Am. Chem. Soc.* **2012**, 134 (25), 10562-10568.
- 661 15. Ishihara, S.; Azzarelli, J. M.; Krikorian, M.; Swager, T. M. Ultratrace detection of  
662 toxic chemicals: triggered disassembly of supramolecular nanotube wrappers. *J. Am.*  
663 *Chem. Soc.* **2016**, 138 (26), 8221-8227.
- 664 16. Azzarelli, J. M.; Mirica, K. A.; Ravnsbæk, J. B.; Swager, T. M. Wireless gas  
665 detection with a smartphone via rf communication. *Proc. Natl. Acad. Sci.* **2014**, 111  
666 (51), 18162.
- 667 17. Jung, J. H.; Park, S. Y.; Lee, J. E.; Lee, B. U.; Bae, G. N. Distinguishing biotic  
668 and abiotic particles using an ultraviolet aerodynamic particle sizer for real-time  
669 detection of bacterial bioaerosols. *Environ. Eng. Sci.* **2012**, 29 (9), 866-874.
- 670 18. Schwarzmeier, K.; Knauer, M.; Ivleva, N. P.; Niessner, R.; Haisch, C. Bioaerosol  
671 analysis based on a label-free microarray readout method using surface-enhanced  
672 Raman scattering. *Anal. Bioanal. Chem.* **2013**, 405 (16), 5387-5392.
- 673 19. Shen, F.; Wang, J.; Xu, Z.; Wu, Y.; Chen, Q.; Li, X.; Jie, X.; Li, L.; Yao, M.; Guo,  
674 X.; Zhu, T. Rapid flu diagnosis using silicon nanowire sensor. *Nano Lett.* **2012**, 12 (7),  
675 3722-3730.
- 676 20. Jin, L.; Xie, J.; Wong, C. K. C.; Chan, S. K.; Abbaszade, G.; Schnelle-Kreis, J.;  
677 Zimmermann R.; Li, J.; Zhang, G.; Fu, P.; Li, X. Contributions of city-specific fine  
678 particulate matter (PM<sub>2.5</sub>) to differential in vitro oxidative stress and toxicity

- 679 implications between Beijing and Guangzhou of China. *Environ. Sci. Technol.* **2019**,  
680 53 (5), 2881-2891.
- 681 21. Li, J.; Chen, H.; Li, X.; Wang, M.; Zhang, X.; Cao, J.; Shen, F.; Wu, Y.; Xu, S.;  
682 Fan, H.; Da, G.; Huang R.; Wang, J.; Chan, C. K.; Jesus, A. L. D.; Morawska, L.; Yao,  
683 M. Differing toxicity of ambient particulate matter (PM) in global cities. *Atmos.*  
684 *Environ.* **2019**, 212, 305-315.
- 685 22. Pleil, J. D. Breath biomarkers in toxicology. *Arch. Toxicol.* **2016**, 90 (11),  
686 2669-2682.
- 687 23. Council, N. R. *Sensor systems for biological agent attacks: protecting buildings*  
688 *and military bases*; 030909576X; National Academies Press: 2005.
- 689 24. Kida, H.; Fukutani, Y.; Mainland, J. D.; Claire, A.; Vihani, A.; Li, Y. R.; Chi, Q.;  
690 Toyama, A.; Liu, L.; Kameda, M.; Yohda, M.; Matsunami, H. Vapor detection and  
691 discrimination with a panel of odorant receptors. *Nat Commun* **2018**, 9 (1), 4556.
- 692 25. Rider, T. H.; Petrovick, M. S.; Nargi, F. E.; Harper, J. D.; Schwoebel, E. D.;  
693 Mathews, R. H.; Blanchard, D. J.; Bortolin, L. T.; Young, A. M.; Chen, J.; Hollis, M.  
694 A. A B cell-based sensor for rapid identification of pathogens. *Science* **2003**, 301  
695 (5630), 213.
- 696 26. Engel, Y.; Elnathan, R.; Pevzner, A.; Davidi, G.; Flaxer, E.; Patolsky, F.  
697 Supersensitive detection of explosives by silicon nanowire arrays. *Angew. Chem. Int.*  
698 *Ed.* **2010**, 49 (38), 6830-6835.
- 699 27. Chen, H.; Li, J.; Zhang, X.; Li, X.; Yao, M.; Zheng, G. Automated in vivo  
700 nanosensing of breath-borne protein biomarkers. *Nano Lett.* **2018**, 18 (8), 4716-4726.
- 701 28. Vereb, H.; Dietrich, A. M.; Alfeeli, B.; Agah, M. The possibilities will take your  
702 breath away: breath analysis for assessing environmental exposure. *Environ. Sci.*  
703 *Technol.* **2011**, 45 (19), 8167-8175.



- 704 29. Haick, H.; Broza, Y. Y.; Mochalski, P.; Ruzsanyi, V.; Amann, A. Assessment,  
705 origin, and implementation of breath volatile cancer markers. *Chem. Soc. Rev.* **2014**,  
706 *43* (5), 1423-1449.
- 707 30. Li, X.; Sinues, P. M. L.; Dallmann, R.; Bregy, L.; Hollmén, M.; Proulx, S.; Brown,  
708 A. S.; Detmar, M.; Kohler, M.; Zenobi, R. Drug pharmacokinetics determined by  
709 real-time analysis of mouse breath. *Angew. Chem. Int. Edit.* **2015**, *54* (27), 7815-7818.
- 710 31. Broza, Y. Y.; Mochalski, P.; Ruzsanyi, V. Amann, A.; Haick, H. Hybrid  
711 volatolomics and disease detection. *Angew. Chem. Int. Edit.* **2015**, *54* (38),  
712 11036-11048.
- 713 32. Wang, F.; Swager, T. M. Diverse chemiresistors based upon covalently modified  
714 multiwalled carbon nanotubes. *J. Am. Chem. Soc.* **2011**, *133* (29), 11181-11193.
- 715 33. Aghdassi, E.; Allard, J. P. Breath alkanes as a marker of oxidative stress in  
716 different clinical conditions. *Free Radic. Biol. Med.* **2000**, *28* (6), 880-886.
- 717 34. Righettoni, M.; Tricoli, A.; Pratsinis, S. E. Si:WO<sub>3</sub> sensors for highly selective  
718 detection of acetone for easy diagnosis of diabetes by breath analysis. *Anal. Chem.*  
719 **2010**, *82* (9), 3581-3587.
- 720 35. Peng, G.; Tisch, U.; Adams, O.; Hakim, M.; Shehada, N.; Broza, Y. Y.; Billan,  
721 S.; Abdah-Bortnyak, R.; Kuten, A. Haick, H. Diagnosing lung cancer in exhaled  
722 breath using gold nanoparticles. *Nat Nanotechnol* **2009**, *4* (10), 669.
- 723 36. Fens, N.; Zwinderman, A. H.; Schee, M. P. v. d.; Nijs, S. B. d.; Dijkers, E.;  
724 Roldaan, A. C.; Cheung, D.; Bel, E. H.; Sterk, P. J. Exhaled breath profiling enables  
725 discrimination of chronic obstructive pulmonary disease and asthma. *Am. J. Respir.*  
726 *Crit. Care Med.* **2009**, *180* (11), 1076-1082.
- 727 37. Ahmed, W. M.; Lawal, O.; Nijsen, T. M.; Goodacre, R.; Fowler, S. J. Exhaled  
728 volatile organic compounds of infection: a systematic review. *ACS Infect Dis* **2017**, *3*

- 729 (10), 695-710.
- 730 38. Zhang, X.; Kang, J.; Chen, H.; Yao, M.; Wang, J. PM<sub>2.5</sub> meets blood: in vivo  
731 damages and immune defense. *Aerosol Air Qual Res* **2018**, *18*, 456-470.
- 732 39. Wei, K.; Li, W.; Gao, S.; Ji, B.; Zang, Y.; Su, B.; Wang, K.; Yao, M.; Zhang, J.;  
733 Wang, J. Inactivation of ricin toxin by nanosecond pulsed electric fields including  
734 evidences from cell and animal toxicity. *Sci. Rep.* **2016**, *6*, 18781.
- 735 40. Buszewski, B.; Ligor, T.; Jezierski, T.; Wenda-Piesik, A.; Walczak, M.; Rudnicka,  
736 J. Identification of volatile lung cancer markers by gas chromatography–mass  
737 spectrometry: comparison with discrimination by canines. *Anal. Bioanal. Chem.* **2012**,  
738 *404* (1), 141-146.
- 739 41. Amal, H.; Leja, M.; Funka, K.; Lasina, I.; Skapars, R.; Sivins, A.; Ancans, G.;  
740 Kikuste, I.; Vanags, A.; Tolmanis, I.; Kirsners, A.; Kupcinskas, L.; Haick, H. Breath  
741 testing as potential colorectal cancer screening tool. *Int. J. Cancer* **2016**, *138* (1),  
742 229-236.
- 743 42. Mochalski, P.; Theurl, M.; Sponring, A.; Unterkofler, K.; Kirchmair, R.; Amann,  
744 A. Analysis of volatile organic compounds liberated and metabolised by human  
745 umbilical vein endothelial cells (HUVEC) in vitro. *Cell Biochem. Biophys.* **2015**, *71*  
746 (1), 323-329.
- 747 43. Machesky, N. J.; Rusnak, J. M.; Moore, E. H.; Dorsey, C. B.; Ward, L. A.  
748 Development of a highly sensitive in vitro endothelial cell toxicity assay for  
749 evaluating ricin toxin A chain-based vaccines or therapeutics. *Toxicon* **2019**, *167*,  
750 152-161.
- 751 44. Fernández del Río, R.; O'Hara, M. E.; Holt, A.; Pemberton, P.; Shah, T.;  
752 Whitehouse, T.; Mayhew, C. A. Volatile biomarkers in breath associated with liver  
753 cirrhosis — comparisons of pre- and post-liver transplant breath samples.

- 754 *EBioMedicine* **2015**, 2 (9), 1243-1250.
- 755 45. Daniel, D. A. P.; Thangavel, K. Breathomics for gastric cancer classification  
756 using back-propagation neural network. *J Med Signals Sens* **2016**, 6 (3), 172-182.
- 757 46. DeMartino, A. W.; Zigler, D. F.; Fukuto, J. M.; Ford, P. C. Carbon disulfide. Just  
758 toxic or also bioregulatory and/or therapeutic? *Chem. Soc. Rev.* **2017**, 46 (1), 21-39.
- 759 47. Cao, W.; Duan, Y. Breath Analysis: Potential for clinical diagnosis and exposure  
760 assessment. *Clin. Chem.* **2006**, 52 (5), 800-811.
- 761 48. Miekisch, W.; Schubert, J. K.; Noeldge-Schomburg, G. F. E. Diagnostic potential  
762 of breath analysis—focus on volatile organic compounds. *Clin. Chim. Acta* **2004**, 347  
763 (1), 25-39.
- 764 49. Wang, X.; Quinn, P. J. *Endotoxins: structure, function and recognition*. Springer  
765 Science & Business Media: 2010; Vol. 53.
- 766 50. Traxler, S.; Bischoff, A.-C.; Saß, R.; Trefz, P.; Gierschner, P.; Brock, B.;  
767 Schwaiger, T.; Karte, C.; Blohm, U.; Schröder, C.; Miekisch, W.; Schubert, J. K. VOC  
768 breath profile in spontaneously breathing awake swine during Influenza A infection.  
769 *Sci. Rep.* **2018**, 8 (1), 14857-14857.
- 770 51. Lodovici, M.; Bigagli, E. Oxidative stress and air pollution exposure. *J. Toxicol.*  
771 **2011**, 2011, 487074-487074.
- 772 52. Nichols, B. G.; Woods, J. S.; Luchtel, D. L.; Corral, J.; Koenig, J. Q. Effects of  
773 ozone exposure on nuclear factor- $\kappa$ B activation and tumor necrosis factor- $\alpha$   
774 expression in human nasal epithelial cells. *Toxicol. Sci.* **2001**, 60 (2), 356-362.
- 775 53. Vrijens, K.; Bollati, V.; Nawrot Tim, S. MicroRNAs as potential signatures of  
776 environmental exposure or effect: a systematic review. *Environ. Health Perspect.*  
777 **2015**, 123 (5), 399-411.
- 778 54. Wei, J.; Li, F.; Yang, J.; Liu, X.; Cho, W. C. MicroRNAs as regulators of airborne

- 779 pollution-induced lung inflammation and carcinogenesis. *Arch. Toxicol.* **2015**, 89 (5),  
780 677-685.
- 781 55. Deshpande, D.; Dileepan, M.; Walseth, T.; Subramanian, S.; Kannan, M. S.  
782 MicroRNA regulation of airway inflammation and airway smooth muscle function:  
783 relevance to asthma. *Drug Dev. Res.* **2015**, 76 (6), 286-295.
- 784 56. Kong, A. P. S.; Xiao, K.; Choi, K. C.; Wang, G.; Chan, M. H.; Ho, C. S.; Chan, I.;  
785 Wong, C. K.; Chan, J. C.N.; Szeto, C. C. Associations between microRNA (miR-21,  
786 126, 155 and 221), albuminuria and heavy metals in Hong Kong Chinese adolescents.  
787 *Clin. Chim. Acta* **2012**, 413 (13), 1053-1057.
- 788 57. Huang, X.; Le, Q.-T.; Giaccia, A. J. MiR-210 – micromanager of the hypoxia  
789 pathway. *Trends Mol. Med.* **2010**, 16 (5), 230-237.
- 790 58. Aranda, J. F.; Madrigal-Matute, J.; Rotllan, N.; Fernández-Hernando, C.  
791 MicroRNA modulation of lipid metabolism and oxidative stress in cardiometabolic  
792 diseases. *Free Radic. Biol. Med.* **2013**, 64, 31-39.
- 793 59. Hakim, M.; Broza, Y. Y.; Barash, O.; Peled, N.; Phillips, M.; Amann, A.; Haick, H.  
794 Volatileorganic compounds of lung cancer and possible biochemical pathways. *Chem.*  
795 *Rev.* **2012**, 112 (11), 5949-5966.
- 796 60. Filipiak, W., Mochalski, P., Filipiak, A.; Ager, C.; Cumeras, R.; Davis, E. C.;  
797 Agapiou, A.; Unterkofler, K.; Troppmair, J. A compendium of volatile organic  
798 compounds (VOCs) released by human cell lines. *Curr. Med. Chem.* **2016**, 23(20),  
799 2112-2131.
- 800 61. Lord, M. J.; Jolliffe, N. A.; Marsden, C. J.; Pateman, C. S.C.; Smith, D. C.;  
801 Spooner, R. A.; Watson, P. D.; Roberts, L. M. Ricin: mechanisms of cytotoxicity.  
802 *Toxicol. Rev.* **2003**, 22 (1), 53-64.
- 803 62. Hybertson, B. M.; Gao, B.; Bose, S. K.; McCord, J. M. Oxidative stress in health

- 804 and disease: the therapeutic potential of Nrf2 activation. *Mol. Aspects Med.* **2011**, 32  
805 (4), 234-246.
- 806 63. Maritim, A. C.; Sanders, R. A.; Watkins Iii, J. B. Diabetes, oxidative stress, and  
807 antioxidants: A review. *J. Biochem. Mol. Toxicol.* **2003**, 17 (1), 24-38.
- 808 64. Birben, E.; Sahiner, U. M.; Sackesen, C.; Erzurum, S.; Kalayci, O. Oxidative  
809 stress and antioxidant defense. *World Allergy Organ J* **2012**, 5 (1), 9-19.
- 810 65. Kosmider, B.; Loader, J. E.; Murphy, R. C.; Mason, R. J. Apoptosis induced by  
811 ozone and oxysterols in human alveolar epithelial cells. *Free Radic. Biol. Med.* **2010**,  
812 48 (11), 1513-1524.
- 813 66. Filipiak, W.; Ruzsanyi, V.; Mochalski, P.; Filipiak, A.; Bajtarevic, A.; Ager, C.;  
814 Denz, H.; Hilbe, W.; Jamnig, H.; Hackl, M.; Dzien, A. Dependence of exhaled breath  
815 composition on exogenous factors, smoking habits and exposure to air pollutants. *J.*  
816 *Breath Res.* **2012**, 6 (3), 21.
- 817 67. Amann, A.; Costello, B. d. L.; Miekisch, W.; Schubert, J.; Buszewski, B.; Pleil, J.;  
818 Ratcliffe, N.; Risby, T. The human volatilome: volatile organic compounds (VOCs) in  
819 exhaled breath, skin emanations, urine, feces and saliva. *J. Breath Res.* **2014**, 8 (3),  
820 034001.
- 821 68. Vander Heiden, M. G.; Cantley, L. C.; Thompson, C. B. Understanding the  
822 Warburg effect: the metabolic requirements of cell proliferation. *Science (New York,*  
823 *N.Y.)* **2009**, 324 (5930), 1029-1033.
- 824 69. Hochachka, P. W. Defense strategies against hypoxia and hypothermia. *Science*  
825 **1986**, 231 (4735), 234.
- 826 70. Laffel, L. Ketone bodies: a review of physiology, pathophysiology and  
827 application of monitoring to diabetes. *Diabetes Metab. Res. Rev.* **1999**, 15 (6),  
828 412-426.

- 829 71. Wlodzimirow, K.A., Abu-Hanna, A.; Schultz, M. J.; Maas, M. A. W.; Bos, L. D. J.;  
830 Sterk, P. J.; Knoebele, H.H.; Soers, R.J.T.; Chamuleau, R. A. F. M., Exhaled breath  
831 analysis with electronic nose technology for detection of acute liver failure in rats.  
832 *Biosens. Bioelectron.* **2013**, 53, 129-134.
- 833 72. Simone M., Kyu-Bok J., Barbara B.; Blake, D. R.; Vaziri, N. D., Exhaled breath  
834 and fecal volatile organic biomarkers of chronic kidney disease. *Biochim. Biophys.*  
835 *Acta, Gen. Subj.* **2013**, 1830(3), 2531-2537.
- 836 73. Mochalski P.; Al-Zoairy R.; Niederwanger A.; Unterkofler K.; Amann A.,  
837 Quantitative analysis of volatile organic compounds released and consumed by rat L6  
838 skeletal muscle cells in vitro. *J. Breath Res.* **2014**, 8(4), 046003.
